# Supplementary material for: Steric and electronic effects of arsa-Buchwald ligands on Suzuki–Miyaura coupling reaction
Source: Royal Society of Chemistry journal article supplement (doi:10.1039/d2dt04139a), 2023-01-01
Supplement: d2dt04139a1.pdf [file d2dt04139a1.pdf]

# Arsa-Buchwald Ligand: Steric and Electronic Effects on Suzuki-Miyaura Coupling Reaction

Akifumi Sumida,<sup>a</sup> Kenta Ogawa,<sup>a</sup> Hiroaki Imoto,<sup>\*a</sup> and Kensuke Naka<sup>\*ab</sup>

<sup>a</sup>*Faculty of Molecular Chemistry and Engineering, Kyoto Institute of Technology, Goshokaido-cho, Matsugasaki, Sakyo-ku, Kyoto 606-8585, Japan.*

*Email: himoto@kit.ac.jp (HI), kenaka@kit.ac.jp (KN).*

<sup>b</sup>*Materials Innovation Lab, Kyoto Institute of Technology, Goshokaido-cho, Matsugasaki, Sakyo-ku, Kyoto 606-8585, Japan.*

## Contents:

- 1 General Information
- 2 Materials
- 3 Synthesis
- 4 NMR spectra
- 5 Crystallographic data
- 6 The ligand screening containing conventional ligands in hindered Suzuki-Miyaura coupling reaction.
- 7 Protodeboronation in electron-deficient boronic acids
- 8 DFT calculation
- 9 The electronic/steric parameters of several ligands
- 10 References

## 1. General Information

All reactions were carried under dry nitrogen atmosphere otherwise noted. Unless otherwise noted, all commercial reagents were used without additional purification. All dry solvents were stored with molecular sieves.  $^1\text{H}$  (400 MHz),  $^{13}\text{C}\{^1\text{H}\}$  (100 MHz), and  $^{19}\text{F}$  (376 MHz) NMR spectra were recorded on a Bruker AVANCE III 400 NMR spectrometer using  $\text{Me}_4\text{Si}$  (TMS) as an internal standard. The following abbreviations are used; s: singlet, d: doublet, t: triplet, q: quartet, m: multiplet. High-resolution mass spectra (HRMS) were obtained on a JEOL JMS-SX102A spectrometer.

## 2. Materials.

Bis(benzonitrile)palladium(II) chloride ( $\text{PdCl}_2(\text{PhCN})_2$ ), allylpalladium(II) chloride dimer ( $[\text{PdCl}(\text{allyl})]_2$ ), palladium(II) acetate ( $\text{Pd}(\text{OAc})_2$ ), tris(dibenzylideneacetone)dipalladium(0)-chloroform adduct ( $\text{Pd}_2(\text{dba})_3\cdot\text{CHCl}_3$ ), methylmagnesium bromide solution (MeMgBr, 1.0 M in dibutyl ether), triphenylarsine ( $\text{AsPh}_3$ ), and SPhos were purchased from Sigma Aldrich. Dichloromethane ( $\text{CH}_2\text{Cl}_2$ ), ethyl acetate (EtOAc), ethanol (EtOH), concentrated ammonia solution (28%  $\text{NH}_{3\text{aq}}$ ), and triphenylphosphine ( $\text{PPh}_3$ ) were purchased from Nacalai Tesque, Inc. Tetrahydrofuran anhydrous (THF), toluene anhydrous, diethyl ether (ether), hexane, magnesium sulfate anhydrous ( $\text{MgSO}_4$ ), ammonium chloride ( $\text{NH}_4\text{Cl}$ ), copper(I) iodide (CuI), and potassium phosphate ( $\text{K}_3\text{PO}_4$ ) were purchased from FUJIFILM Wako Pure Chemical Industry, Ltd. Cyclopentylmagnesium bromide (CypMgBr, 1.0 M in THF), *tert*-butylmagnesium chloride (*t*BuMgCl, 1.0 M in THF), 1,3,5-trimethoxybenzene, 2-methylphenylboronic acid, 1-naphthaleneboronic acid, 2-biphenylboronic acid, 2,4,6-trimethylphenylboronic acid, 4-(trifluoromethyl)phenylboronic acid, 2,4,6-trifluorophenylboronic acid, 4-cyanophenylboronic acid, mesityl bromide, 2-bromotoluene, 2-bromoanisole, 2-bromo-*N,N*-dimethylaniline, 2-bromo-1,3-dimethoxybenzene, 3-chlorobenzonitrile, 3-chlorotoluene and 1,3,5-trifluorobenzene were purchased from Tokyo Chemical Industry Co., Ltd. 2-Bromo-1,3,5-triisopropylbenzene was purchased from Angene Chemical. 2-Benzodithiaarsolylbiphenyl · 2-(benzodithiaarsolyl)-2',6'-dimethoxybiphenyl, 2-(dicyclohexylarsino)-3,6-dimethoxy-2',4',6'-triisopropyl-1,1'-biphenyl (**L1**), 2-(dicyclohexylarsino)-2',6'-diisopropoxybiphenyl (**L2**), 2-(dicyclohexylarsino)-2'-(dimethylamino)biphenyl (**L3**), 2-(dicyclohexylarsino)-2'-methylbiphenyl (**L4**), 2-(dicyclohexylarsino)-2',4',6'-tri(isopropyl)biphenyl (**L5**), 2-(dicyclohexylarsino)-2',6'-dimethoxy-1,1'-biphenyl (**L6**), and 2-(dicyclohexylarsino)biphenyl (**L7**) were prepared according to literature procedures.<sup>1</sup>

### 3. Synthesis

#### *The general procedure for arsine ligands*

To a suspension of substituted dithiaarsole (1 eq.) and CuI (25 mol%) in anhydrous THF, ethereal solution of Grignard reagent (5 eq.) was added dropwise at 0 °C. Black precipitates soon appeared and the resulting mixture was stirred at room temperature for 3 h. The reaction was quenched with saturated  $\text{NH}_4\text{Cl}_{\text{aq}}$  and an aqueous layer was extracted with ether. The combined organic layer was washed with 28%  $\text{NH}_3_{\text{aq}}$  (three times) and brine (once), and dried over  $\text{MgSO}_4$ , and filtered. The volatiles were removed *in vacuo*, and the residue was purified with  $\text{SiO}_2$  chromatography or by recrystallization to give the title compounds.

#### *2-(Dimethylarsino)biphenyl (L8)*

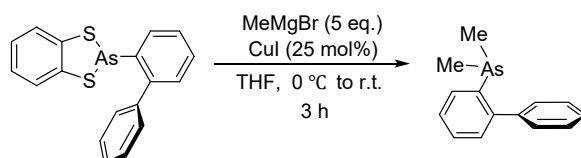

Prepared according to general procedure: 2-Benzodithiaarsolylbiphenyl (103 mg, 0.280 mmol), CuI (14.6 mg, 0.077 mmol), anhydrous THF (1.4 mL), and MeMgBr (1.0 M, 1.4 mL, 1.4 mmol) were employed. Purified with  $\text{SiO}_2$  chromatography (hexane) to give the title compound as colorless oil (63 mg, 0.218 mmol, 80%).  $^1\text{H-NMR}$  ( $\text{CDCl}_3$ , 400 MHz):  $\delta$  = 7.55-7.52 (m, 1H, Ar-H), 7.39-7.30 (m, 7H, Ar-H), 7.26-7.24 (m, 1H, Ar-H), 0.99 (s, 6H, Me) ppm.  $^{13}\text{C}\{^1\text{H}\}$ -NMR ( $\text{CDCl}_3$ , 100 MHz):  $\delta$  = 147.0, 142.5, 141.8, 130.2, 129.5, 129.4, 127.9, 127.7, 127.3, 127.2, 10.7 ppm. HR-FAB-MS (m/z): calculated for  $\text{C}_{14}\text{H}_{15}\text{As}$   $[\text{M}]^+$ ; 258.0390, observed; 258.0398.

#### *2-(Dicyclopentylarsino)biphenyl (L9)*

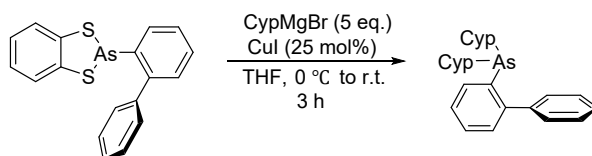

Prepared according to general procedure: 2-Benzodithiaarsolylbiphenyl (100 mg, 0.271 mmol), CuI (12.9 mg, 0.068 mmol), anhydrous THF (1.4 mL), and CypMgBr (1.0 M, 1.4 mL, 1.4 mmol) were employed. Recrystallization from  $\text{CH}_2\text{Cl}_2/\text{EtOH}$  to give the title compound as colorless solid (80 mg, 0.218 mmol, 80%).  $^1\text{H-NMR}$  ( $\text{CDCl}_3$ , 400 MHz):  $\delta$  = 7.64-7.62 (m, 1H, Ar-H), 7.41-7.26 (m, 8H, Ar-H), 2.16 (quintet,  $J$  = 8.6 Hz, 2H,  $\text{CH}_2\text{CHCH}_2$ ), 1.91-1.84 (m, 2H,  $\text{CH}_2$ ), 1.67-1.37 (m, 12H,  $\text{CH}_2$ ), 1.25-1.14 (m, 2H,  $\text{CH}_2$ ) ppm.  $^{13}\text{C}\{^1\text{H}\}$ -NMR ( $\text{CDCl}_3$ , 100 MHz):

$\delta$  = 148.9, 143.2, 140.16, 132.8, 130.5, 129.4, 127.6, 127.5, 127.0, 126.8, 38.6, 31.6, 30.8, 26.4, 25.7 ppm. HR-FAB-MS (m/z): calculated for C<sub>22</sub>H<sub>27</sub>As [M]<sup>+</sup>; 366.1329, observed; 366.1325.

**2-(Di-tert-butylarsino)biphenyl (L10)**

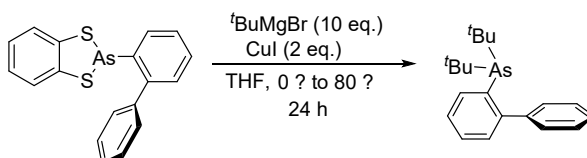

To a suspension of 2-Benzodithiaarsolylbiphenyl (97 mg, 0.264 mmol), and CuI (100 mg, 0.522 mmol), anhydrous THF (0.5 mL), <sup>t</sup>BuMgCl (1.0 M, 2.6 mL, 2.6 mmol) was added dropwise at 0 °C. Black precipitates soon appeared and the resulting mixture was stirred at 80 °C for 24 h. The reaction was quenched with saturated NH<sub>4</sub>Cl<sub>aq</sub> and an aqueous layer was extracted with ether. The combined organic layer was washed with 28% NH<sub>3</sub><sub>aq</sub> three times and brine once, dried over MgSO<sub>4</sub>, and filtered. The volatiles were removed *in vacuo*, and the residue was purified with SiO<sub>2</sub> chromatography (hexane/EtOAc = 40/1) to give the title compound as colorless solid (35 mg, 0.102 mmol, 39%). <sup>1</sup>H-NMR (CDCl<sub>3</sub>, 400 MHz):  $\delta$  = 7.82-7.80 (m, 1H, Ar-H), 7.36-7.23 (m, 8H, Ar-H), 1.17 (s, 18H, Me) ppm. <sup>13</sup>C{<sup>1</sup>H}-NMR (CDCl<sub>3</sub>, 100 MHz):  $\delta$  = 150.6, 143.8, 138.8, 135.0, 130.6, 130.1, 127.8, 127.3, 126.6, 126.0, 34.8, 30.6 ppm. HR-FAB-MS (m/z): calculated for C<sub>20</sub>H<sub>27</sub>As [M]<sup>+</sup>; 342.1329, observed; 342.1327.

**2-(Dicyclopentylarsino)-2',6'-dimethoxy-1,1'-biphenyl (L11)**

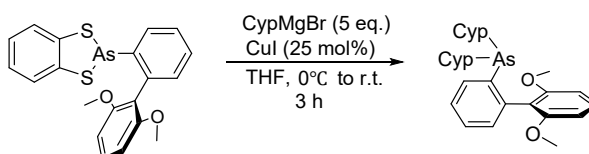

Prepared according to general procedure: 2-(Benzodithiaarsolyl)-2',6'-dimethoxybiphenyl (240 mg, 0.564 mmol), CuI (26.7 mg, 0.140 mmol), anhydrous THF (2.8 mL), and CypMgBr (1.0 M, 2.8 mL, 2.8 mmol) were employed. Recrystallization from CH<sub>2</sub>Cl<sub>2</sub>/EtOH to give the title compound as colorless solid (191 mg, 0.447 mmol, 80%). <sup>1</sup>H-NMR (CDCl<sub>3</sub>, 400 MHz):  $\delta$  = 7.59 (dd, *J* = 7.6, 1.6 Hz, 1H, Ar-H), 7.37-7.25 (m, 3H, Ar-H), 7.14 (dd, *J* = 7.6, 1.6 Hz, 1H, Ar-H), 6.60 (d, *J* = 8.0 Hz, 2H, Ar-H), 3.68 (s, 6H, OMe), 2.15 (quintet, *J* = 8.4 Hz, 2H, CH<sub>2</sub>CHCH<sub>2</sub>), 1.87-1.84 (m, 2H, CH<sub>2</sub>), 1.64-1.36 (m, 12H, CH<sub>2</sub>), 1.26-1.16 (m, 2H, CH<sub>2</sub>) ppm. <sup>13</sup>C{<sup>1</sup>H}-NMR (CDCl<sub>3</sub>, 100 MHz):  $\delta$  = 157.6, 142.4, 141.1, 132.1, 130.2, 128.9, 127.7, 126.8, 120.3, 103.2, 55.4, 38.1, 31.0, 30.8, 26.5, 25.8 ppm. HR-FAB-MS (m/z): calculated for

$C_{24}H_{31}O_2As [M]^+$ ; 426.1540, observed; 426.1531.

**[PdCl<sub>2</sub>(L11)<sub>2</sub>]**

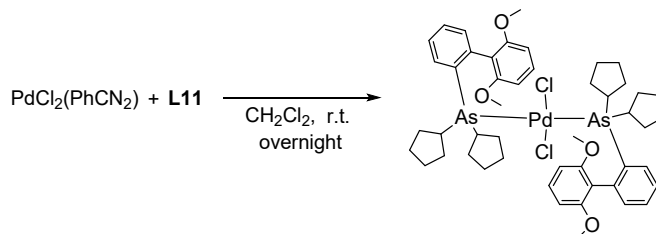

A  $CH_2Cl_2$  (1.0 mL) solution of **L11** (60.4 mg, 0.142 mmol) and  $PdCl_2(PhCN)_2$  (26.8 mg, 69.9  $\mu$ mol) was stirred at room temperature under a nitrogen atmosphere overnight. The volatiles were removed *in vacuo*. To the residue was added  $CH_2Cl_2$ , and the insoluble part was removed by filtration. The solvent was removed *in vacuo*, and the obtained products were further purified by recrystallization from  $CH_2Cl_2$ /hexane to obtain orange crystals of **[PdCl<sub>2</sub>(L11)<sub>2</sub>]** (63.9 mg, 0.620 mmol, 89%). <sup>1</sup>H-NMR ( $CDCl_3$ , 400 MHz):  $\delta$  = 8.26-8.24 (m, 2H, Ar-H), 7.43-7.30 (m, 6H, Ar-H), 7.07-7.05 (m, 2H, Ar-H), 6.62 (d,  $J$  = 8.4 Hz, 4H, Ar-H), 3.65 (s, 12H, OMe), 2.42-2.33 (m, 4H,  $CH_2CHCH_2$ ), 2.04-1.86 (m, 10H,  $CH_2$ ), 1.76-1.64 (m, 12H,  $CH_2$ ), 1.41-1.35 (m, 10H,  $CH_2$ ) ppm. <sup>13</sup>C{<sup>1</sup>H}-NMR ( $CDCl_3$ , 100 MHz):  $\delta$  = 158.2, 139.0, 137.3, 134.5, 132.2, 129.3, 128.9, 125.8, 119.3, 103.5, 55.3, 37.8, 30.7, 29.6, 26.1, 25.7 ppm. HR-FAB-MS ( $m/z$ ): calculated for  $C_{48}H_{62}ClO_4As_2Pd [M-Cl]^+$ ; 993.1803, observed; 993.1802.

**[PdCl(allyl)(L11)]**

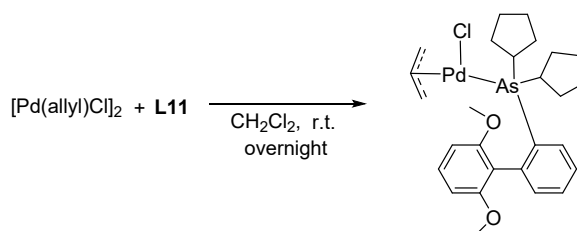

A  $CH_2Cl_2$  (0.5 mL) solution of **L11** (15.7 mg, 36.8  $\mu$ mol) and  $[PdCl(allyl)]_2$  (6.6 mg, 18.0  $\mu$ mol) was stirred at room temperature under a nitrogen atmosphere overnight. The volatiles were removed *in vacuo*. To the residue was added  $CH_2Cl_2$ , and the insoluble part was removed by filtration. The solvent was removed *in vacuo*, and the obtained products were further purified by recrystallization from  $CH_2Cl_2$ /hexane to obtain orange crystals of **[PdCl(allyl)(L11)]** (8.5 mg, 14  $\mu$ mol, 77 %). <sup>1</sup>H-NMR ( $CDCl_3$ , 400 MHz):  $\delta$  = 7.65 (dd,  $J$  = 7.6, 1.2 Hz, 1H, Ar-H), 7.42 (dt,  $J$  = 7.6, 1.2 Hz, 1H, Ar-H), 7.35 (dt,  $J$  = 7.6, 1.2 Hz, 1H, Ar-H), 7.26 (t,  $J$  = 8.4 Hz, 1H, Ar-H), 7.13 (dt,  $J$  = 7.6, 1.2 Hz, 1H, Ar-H), 6.68 (d,  $J$  = 8.4 Hz, 1H, Ar-H), 6.51 (d,  $J$  = 8.0 Hz, 1H, Ar-H), 4.95 (septet,  $J$  = 6.8 Hz, 1H,  $CH=CH_2$ ), 4.45 (dd,  $J$  = 7.2, 2.0 Hz, 1H,

CH=CH<sub>2</sub>), 3.80 (s, 3H, CH=CH<sub>2</sub>), 3.68 (s, 3H, CH=CH<sub>2</sub>), 3.55 (dd, *J* = 6.8, 1.2 Hz, 1H, CH=CH<sub>2</sub>), 2.88 (d, *J* = 13.2 Hz, 1H, CH=CH<sub>2</sub>), 2.65 (quartet, *J* = 9.2 Hz, 1H, CH=CH<sub>2</sub>), 2.52 (quartet, *J* = 9.2 Hz, 1H, CH<sub>2</sub>CHCH<sub>2</sub>), 1.87-1.46 (m, 18H, CH<sub>2</sub>) ppm. <sup>13</sup>C{<sup>1</sup>H}-NMR (CDCl<sub>3</sub>, 100 MHz): δ = 158.17, 140.3, 136.6, 132.6, 132.3, 129.1, 128.7, 126.6, 113.6, 104.5, 103.2, 55.7, 55.5, 51.4, 39.1, 38.5, 31.6, 30.9, 30.4, 30.0, 29.9, 26.6, 26.2, 25.5 ppm. HR-FAB-MS (*m/z*): calculated for C<sub>27</sub>H<sub>35</sub>O<sub>2</sub>AsPd [M-Cl]<sup>+</sup>; 572.0888, observed; 572.0888.

*General procedure A for ligand screening of Suzuki-Miyaura couplings using Pd catalysts.*

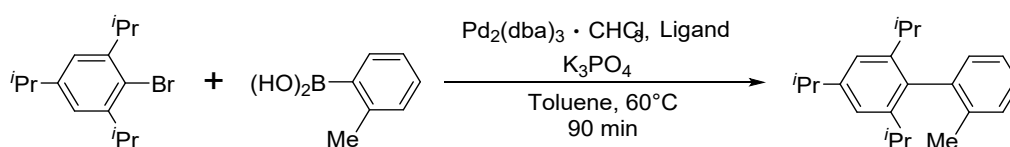

To the mixture of 2,4,6-triisopropylbromobenzene (125 μL, 0.50 mmol), 2-methylphenylboronic acid (136.0 mg, 1.0 mmol), K<sub>3</sub>PO<sub>4</sub> (318.4 mg, 1.50 mmol), Pd<sub>2</sub>(dba)<sub>3</sub>·CHCl<sub>3</sub> (7.8 mg, 7.5 μmol), and ligand (30 μmol), degassed toluene (1.0 mL) was added and stirred at 60 °C for 90 min under nitrogen atmosphere. The crude product was passed through the pad of silica and 1,3,5-trimethoxybenzene (30.0 mg, 0.178 mmol) was added as an internal standard. The yield of the target compound was evaluated by <sup>1</sup>H-NMR.

*General procedure B for Pd source screening of Suzuki-Miyaura couplings.*

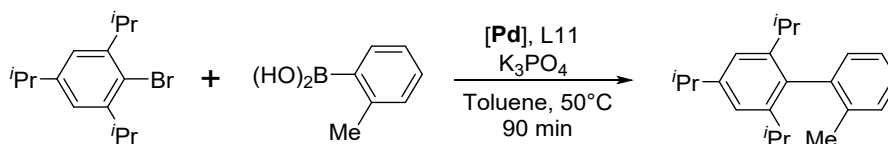

To the mixture of 2,4,6-triisopropylbromobenzene (125 μL, 0.50 mmol), 2-methylphenylboronic acid (136.0 mg, 1.0 mmol), K<sub>3</sub>PO<sub>4</sub> (318.4 mg, 1.50 mmol), Pd sources (2.5 μmol), and **L11** (2.1 mg, 5.0 μmol), degassed toluene (1.0 mL) was added and stirred at 50 °C for 90 min under nitrogen atmosphere. The crude product was passed through the pad of silica and 1,3,5-trimethoxybenzene (30.0 mg, 0.178 mmol) was added as an internal standard. The yield of the target compound was evaluated by <sup>1</sup>H-NMR.

*General Procedure C for the Pd-catalyzed Suzuki-Miyaura coupling.*

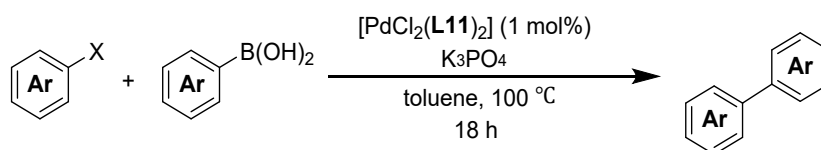

To the mixture of aryl halide (0.50 mmol), boronic acid (1.0 mmol),  $K_3PO_4$  (318.4 mg, 1.50 mmol),  $PdCl_2(L11)_2$  (5.1 mg, 5.0  $\mu$ mol), degassed toluene (1.0 mL) was added and stirred at 100 °C for 18 h under nitrogen atmosphere. The crude product was passed through the pad of silica and 1,3,5-trimethoxybenzene (30.0 mg, 0.178 mmol) was added as an internal standard. The yield of the target compound was evaluated by  $^1H$ -NMR. The residue was purified by silica column chromatography to give the target compound.

#### 1-[2,4,6-Tris(1-methylethyl)phenyl]naphthalene (**P1**)

To the mixture of 2-bromo-1,3,5-triisopropylbenzene (125  $\mu$ L, 0.50 mmol), 1-naphthaleneboronic acid (171.1 mg, 1.0 mmol),  $K_3PO_4$  (316.6 mg, 1.49 mmol),  $PdCl_2(L11)_2$  (2.6 mg, 2.5  $\mu$ mol), degassed toluene (1.0 mL) was added and stirred at 100 °C for 18 h under nitrogen atmosphere. The crude product was passed through the pad of silica and 1,3,5-trimethoxybenzene (30.0 mg, 0.178 mmol) was added as an internal standard. The yield of the target compound was evaluated by  $^1H$ -NMR. The residue was purified by silica column chromatography (hexane) to give the target compound as colorless solid (0.148 g, 0.447 mmol, 90%).  $^1H$ -NMR ( $CDCl_3$ , 400 MHz):  $\delta$  = 7.86-7.80 (m, 2H, Ar-H), 7.48 (dd,  $J$  = 7.2, 1.2 Hz, 1H, Ar-H), 7.42-7.39 (m, 2H, Ar-H), 7.31-7.27 (m, 2H, Ar-H), 7.14 (s, 2H, Ar-H), 3.00 (septet,  $J$  = 6.9 Hz, 1H,  $CHMe_2$ ), 2.35 (septet,  $J$  = 6.9 Hz, 2H,  $CHMe_2$ ), 1.35 (d,  $J$  = 6.8 Hz, 6H,  $CHMe_2$ ), 1.04 (d,  $J$  = 6.8 Hz, 6H,  $CHMe_2$ ), 0.95 (d,  $J$  = 7.2 Hz, 6H,  $CHMe_2$ ) ppm.  $^{13}C\{^1H\}$ -NMR ( $CDCl_3$ , 100 MHz):  $\delta$  = 148.1, 147.3, 138.6, 134.4, 133.4, 133.2, 128.0, 127.3, 127.0, 126.4, 125.7, 125.6, 125.2, 120.7, 34.3, 30.5, 24.8, 24.2, 23.9 ppm.

#### 2,4,6-Tris(1-methylethyl)-1,1',2',1''-terphenyl (**P2**)

Following general procedure C, 2-bromo-1,3,5-triisopropylbenzene (125  $\mu$ L, 0.50 mmol), and 2-biphenylboronic acid (196.6 mg, 1.0 mmol) were used. The residue was purified by silica column chromatography (hexane) to give the target compound as colorless solid (128 mg, 0.359 mmol, 73%).  $^1H$ -NMR ( $CDCl_3$ , 400 MHz):  $\delta$  = 7.48 (dd,  $J$  = 7.6, 1.2 Hz, 1H, Ar-H), 7.40 (dt,  $J$  = 7.6, 1.6 Hz, 1H, Ar-H), 7.33 (dt,  $J$  = 7.6, 1.6 Hz, 1H, Ar-H), 7.22 (dd,  $J$  = 7.6, 1.2 Hz, 1H, Ar-H), 7.12-7.06 (m, 5H, Ar-H), 6.91 (s, 2H, Ar-H), 2.86 (septet,  $J$  = 6.8 Hz, 1H,  $CHMe_2$ ), 2.55 (septet,  $J$  = 6.8 Hz, 2H,  $CHMe_2$ ), 1.24 (d,  $J$  = 6.8 Hz, 6H,  $CHMe_2$ ), 1.01 (d,  $J$  = 6.8 Hz, 6H,  $CHMe_2$ ), 0.84 (d,  $J$  = 6.8 Hz, 6H,  $CHMe_2$ ) ppm.  $^{13}C\{^1H\}$ -NMR ( $CDCl_3$ , 100 MHz):  $\delta$  = 147.9, 146.2, 141.2, 138.8, 135.6, 131.3, 129.6, 129.4, 127.4, 127.2, 126.7, 126.3, 120.5,

34.1, 30.4, 25.5, 24.1, 22.7 ppm.

***2,4,6-Trimethyl-1,1',2',1''-terphenyl (P3)***

Following general procedure C, mesityl bromide (78  $\mu\text{L}$ , 0.52 mmol), and 2-biphenylboronic acid (205.1 mg, 1.0 mmol) were used. The residue was purified by silica column chromatography (hexane) to give the target compound as colorless oil (132 mg, 0.484 mmol, 94%).  $^1\text{H-NMR}$  ( $\text{CDCl}_3$ , 400 MHz):  $\delta$  = 7.46-7.33 (m, 3H, Ar-*H*), 7.15-7.07 (m, 6H, Ar-*H*), 6.77 (s, 2H, Ar-*H*), 2.23 (s, 3H, Me), 1.89 (s, 6H, Me) ppm.  $^{13}\text{C}\{^1\text{H}\}$ -NMR ( $\text{CDCl}_3$ , 100 MHz):  $\delta$  = 141.4, 140.9, 139.0, 137.9, 136.2, 135.8, 130.7, 130.1, 128.8, 127.9, 127.6, 127.3, 127.2, 126.5, 21.0, 20.7 ppm.

***2,2',4,6-Tetramethyl-1,1'-biphenyl (P4)***

Following general procedure C, 2-bromotoluene (60  $\mu\text{L}$ , 0.50 mmol), and 2,4,6-trimethylphenylboronic acid (163.6 mg, 1.0 mmol) were used. The residue was purified by silica column chromatography (hexane) to give the target compound as colorless oil (99 mg, 0.470 mmol, 95%).  $^1\text{H-NMR}$  ( $\text{CDCl}_3$ , 400 MHz):  $\delta$  = 7.27-7.21 (m, 3H, Ar-*H*), 7.01-6.99 (m, 1H, Ar-*H*), 6.93 (s, 2H, Ar-*H*), 2.32 (s, 3H, Me), 1.97 (s, 3H, Me), 1.91 (s, 6H, Me) ppm.  $^{13}\text{C}\{^1\text{H}\}$ -NMR ( $\text{CDCl}_3$ , 100 MHz):  $\delta$  = 140.6, 138.2, 136.3, 135.8, 135.7, 129.9, 129.1, 128.0, 126.9, 126.0, 21.1, 20.2, 19.5 ppm.

***2,2',4,4',6,6'-Hexamethyl-1,1'-biphenyl (P5)***

Following general procedure C, mesityl bromide (75  $\mu\text{L}$ , 0.50 mmol), and 2,4,6-trimethylphenylboronic acid (164.1 mg, 1.0 mmol) were used. The residue was purified by silica column chromatography (hexane) to give the target compound as colorless oil (79 mg, 0.332 mmol, 66%).  $^1\text{H-NMR}$  ( $\text{CDCl}_3$ , 400 MHz):  $\delta$  = 6.93 (s, 4H, Ar-*H*), 2.32 (s, 6H, Me), 1.86 (s, 12H, Me) ppm.  $^{13}\text{C}\{^1\text{H}\}$ -NMR ( $\text{CDCl}_3$ , 100 MHz):  $\delta$  = 137.0, 136.0, 135.5, 128.2, 21.1, 19.8 ppm.

***2'-Methoxy-2,4,6-trimethyl-1,1'-biphenyl (P7)***

Following general procedure C, 2-bromoanisole (65  $\mu\text{L}$ , 0.50 mmol), and 2,4,6-trimethylphenylboronic acid (163.6 mg, 1.0 mmol) were used. The residue was purified by silica column chromatography (hexane/EtOAc = 30/1) to give the target compound as colorless oil (0.102 g, 0.450 mmol, 90%).  $^1\text{H-NMR}$  ( $\text{CDCl}_3$ , 400 MHz):  $\delta$  = 7.26-7.22 (m, 1H, Ar-*H*), 6.95-6.85 (m, 5H, Ar-*H*), 3.64 (s, 3H, OMe), 2.24 (s, 3H, Me), 1.90 (s, 6H, Me) ppm.  $^{13}\text{C}\{^1\text{H}\}$ -NMR ( $\text{CDCl}_3$ , 100 MHz):  $\delta$  = 156.7, 136.4, 136.4, 135.3, 130.9, 129.5, 128.3, 127.9, 120.6, 110.7, 55.3, 21.1, 20.3 ppm.



***N,N,2'-Trimethyl[1,1'-biphenyl]-2-amine (P8)***

Following general procedure C, 2-bromo-*N,N*-dimethylaniline (72  $\mu$ L, 0.50 mmol), and 2-methylphenylboronic acid (136.0 mg, 1.0 mmol) were used. The residue was purified by silica column chromatography (hexane/EtOAc = 30/1) to give the target compound as colorless oil (97 mg, 0.460 mmol, 92%).  $^1\text{H-NMR}$  ( $\text{CDCl}_3$ , 400 MHz):  $\delta$  = 7.29-7.19 (m, 5H, Ar-*H*), 7.09-6.95 (m, 3H, Ar-*H*), 2.50 (s, 6H, NMe), 2.15 (s, 3H, Me) ppm.  $^{13}\text{C}\{^1\text{H}\}$ -NMR ( $\text{CDCl}_3$ , 100 MHz):  $\delta$  = 151.5, 141.7, 136.1, 134.5, 131.7, 130.0, 129.9, 127.9, 126.7, 125.6, 121.0, 117.4, 43.1, 20.0 ppm.

***2,6-Dimethoxy-1,1:2,1-terphenyl (P9)***

Following general procedure C, 2-bromo-1,3-dimethoxybenzene (108.5 mg, 0.50 mmol), and 2-methylphenylboronic acid (136.0 mg, 1.0 mmol) were used. The residue was purified by silica column chromatography (hexane/EtOAc = 30/1) to give the target compound as colorless oil (136 mg, 0.468 mmol, 94%).  $^1\text{H-NMR}$  ( $\text{CDCl}_3$ , 400 MHz):  $\delta$  = 7.42-7.29 (m, 4H, Ar-*H*), 7.12-7.03 (m, 6H, Ar-*H*), 6.39 (d,  $J$  = 8.4 Hz, 2H, Ar-*H*), 3.44 (s, 6H, OMe) ppm.  $^{13}\text{C}\{^1\text{H}\}$ -NMR ( $\text{CDCl}_3$ , 100 MHz):  $\delta$  = 157.5, 142.4, 142.2, 132.8, 131.6, 129.3, 128.6, 128.5, 127.3, 127.1, 126.7, 126.1, 118.9, 103.6, 55.4 ppm.

***2-Methyl-4'-(trifluoromethyl)-1,1'-biphenyl (P11)***

Following general procedure C, 2-bromotoluene (60  $\mu$ L, 0.50 mmol), and 4-(trifluoromethyl)phenylboronic acid (189.2 mg, 1.0 mmol) were used. The residue was purified by silica column chromatography (hexane) to give the target compound as colorless oil (106 mg, 0.448 mmol, 90%).  $^1\text{H-NMR}$  ( $\text{CDCl}_3$ , 400 MHz):  $\delta$  = 7.65 (d,  $J$  = 8.0 Hz, 2H, Ar-*H*), 7.42 (d,  $J$  = 8.0 Hz, 2H, Ar-*H*), 7.29-7.18 (m, 4H, Ar-*H*), 2.25 (s, 3H, Me) ppm.  $^{13}\text{C}\{^1\text{H}\}$ -NMR ( $\text{CDCl}_3$ , 100 MHz):  $\delta$  = 145.7, 140.6, 135.3, 130.6, 129.6, 129.6, 128.8 (q,  $J$  = 32.0 Hz), 128.0, 126.0, 125.1 (q,  $J$  = 4.0 Hz), 124.0 (q,  $J$  = 191.0 Hz), 20.4 ppm.  $^{19}\text{F-NMR}$  ( $\text{CDCl}_3$ , 376 MHz):  $\delta$  = -62.3 ppm.

***2,4,6-Trimethyl-4'-(trifluoromethyl)-1,1'-biphenyl (P12)***

Following general procedure C, mesityl bromide (75  $\mu$ L, 0.50 mmol), and 4-(trifluoromethyl)phenylboronic acid (189.6 mg, 1.0 mmol) were used. The residue was purified by silica column chromatography (hexane) to give the target compound as colorless oil (125 mg, 0.473 mmol, 95%).  $^1\text{H-NMR}$  ( $\text{CDCl}_3$ , 400 MHz):  $\delta$  = 7.66 (d,  $J$  = 8.0 Hz, 2H, Ar-*H*), 7.25 (d,  $J$  = 7.6 Hz, 2H, Ar-*H*), 6.95 (s, 2H, Ar-*H*), 2.33 (s, 3H, Me), 1.98 (s, 6H, Me) ppm.  $^{13}\text{C}\{^1\text{H}\}$ -NMR ( $\text{CDCl}_3$ , 100 MHz):  $\delta$  = 145.1, 137.7, 137.3, 135.7, 129.8, 129.0 (q,  $J$  = 32.0

Hz), 128.3, 125.4 (q,  $J = 4.0$  Hz), 124.0 (q,  $J = 190.0$  Hz), 21.0, 20.7 ppm.  $^{19}\text{F}$ -NMR ( $\text{CDCl}_3$ , 376 MHz):  $\delta = -62.3$  ppm.

***2,4,6-Trifluoro-2'-methyl-1,1'-biphenyl (P13)***

Following general procedure C, 2-bromotoluene (60  $\mu\text{L}$ , 0.50 mmol), and 2,4,6-trifluorophenylboronic acid (175.9 mg, 1.0 mmol) were used. The residue was purified by silica column chromatography (hexane/EtOAc = 20/1) to give the target compound as colorless oil (7 mg, 32  $\mu\text{mol}$ , 6%).  $^1\text{H}$ -NMR ( $\text{CDCl}_3$ , 400 MHz):  $\delta = 7.34$ -7.18 (m, 4H, Ar-*H*), 6.77-6.73 (m, 2H, Ar-*H*), 2.17 (s, 3H, Me) ppm.  $^{13}\text{C}\{^1\text{H}\}$ -NMR ( $\text{CDCl}_3$ , 100 MHz):  $\delta = 163.3$ -158.9 (m), 137.5, 130.8, 130.2, 128.9, 128.0, 125.7, 100.5-99.9 (m), 19.7 ppm.  $^{19}\text{F}$ -NMR ( $\text{CDCl}_3$ , 376 MHz):  $\delta = -110.3$  (3F, broad s) ppm.

***2'-Methyl[1,1'-biphenyl]-4-carbonitrile (P14)***

Following general procedure C, 2-bromotoluene (60  $\mu\text{L}$ , 0.50 mmol), and 4-cyanophenylboronic acid (146.6 mg, 1.0 mmol) were used. The residue was purified by silica column chromatography (hexane/EtOAc = 20/1) to give the target compound as colorless oil (33 mg, 0.169 mmol, 34%).  $^1\text{H}$ -NMR ( $\text{CDCl}_3$ , 400 MHz):  $\delta = 7.72$ -7.69 (m, 2H, Ar-*H*), 7.44-7.41 (m, 2H, Ar-*H*), 7.32-7.25 (m, 3H, Ar-*H*), 7.19 (d,  $J = 7.6$  Hz, 1H, Ar-*H*), 2.25 (s, 3H, Me) ppm.  $^{13}\text{C}\{^1\text{H}\}$ -NMR ( $\text{CDCl}_3$ , 100 MHz):  $\delta = 146.8$ , 140.0, 135.0, 132.0, 130.7, 130.0, 129.4, 128.3, 126.1, 119.0, 110.7, 20.3 ppm.

***1,1':2',1''-Terphenyl, 3-methyl (P16)***

Following general procedure C, 3-chlorotoluene (60  $\mu\text{L}$ , 0.50 mmol), and 2-biphenylboronic acid (198.0 mg, 1.0 mmol) were used. The residue was purified by silica column chromatography (hexane) to give the target compound as colorless oil (15 mg, 61  $\mu\text{mol}$ , 13%).  $^1\text{H}$ -NMR ( $\text{CDCl}_3$ , 400 MHz):  $\delta = 7.41$ -7.39 (m, 4H, Ar-*H*), 7.23-7.00 (m, 8H, Ar-*H*), 6.88 (d,  $J = 7.6$  Hz, 1H, Ar-*H*), 2.24 (s, 3H, Me) ppm.  $^{13}\text{C}\{^1\text{H}\}$ -NMR ( $\text{CDCl}_3$ , 100 MHz):  $\delta = 141.6$ , 141.4, 140.7, 140.6, 137.4, 130.6, 130.6, 129.9, 127.8, 127.6, 127.4, 127.4, 127.2, 127.1, 126.4, 21.4 ppm.

***2-Methyl-4'-nitro-1,1'-biphenyl (P17)***

Following general procedure C, 3-chlorotoluene (60  $\mu\text{L}$ , 0.50 mmol), and 2,4,6-trimethylphenylboronic acid (163.9 mg, 1.0 mmol) were used. The residue was purified by silica column chromatography (hexane) to give the target compound as colorless oil (29 mg, 0.138 mmol, 27%).  $^1\text{H}$ -NMR ( $\text{CDCl}_3$ , 400 MHz):  $\delta = 7.29$  (t,  $J = 7.2$  Hz, 1H, Me), 7.13 (d,  $J = 7.6$  Hz, 1H, Me), 6.94-6.93 (m, 4H, Me), 2.37 (s, 3H, Me), 2.32 (s, 3H, Me), 2.00 (s, 6H, Me)

ppm.  $^{13}\text{C}\{^1\text{H}\}$ -NMR ( $\text{CDCl}_3$ , 100 MHz):  $\delta$  = 141.0, 139.2, 137.8, 136.4, 135.9, 129.9, 128.2, 128.0, 127.2, 126.3, 21.5, 21.0, 20.8 ppm.

## 4. NMR spectra

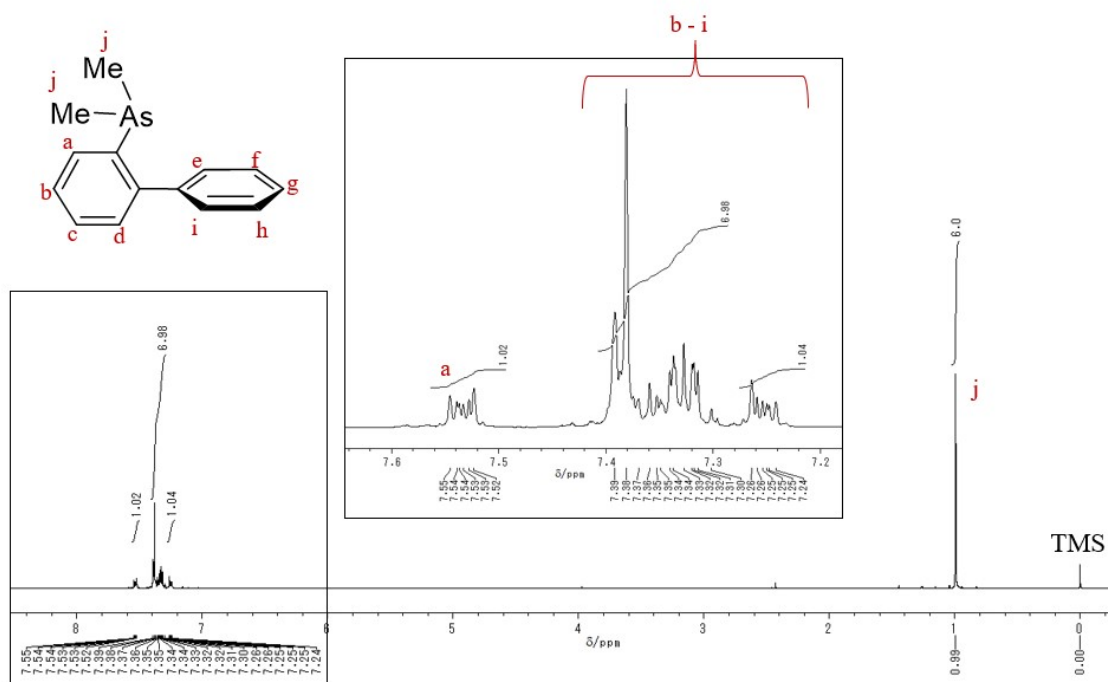

Figure S1. <sup>1</sup>H-NMR spectrum (400 MHz) of L8 in CDCl<sub>3</sub>.

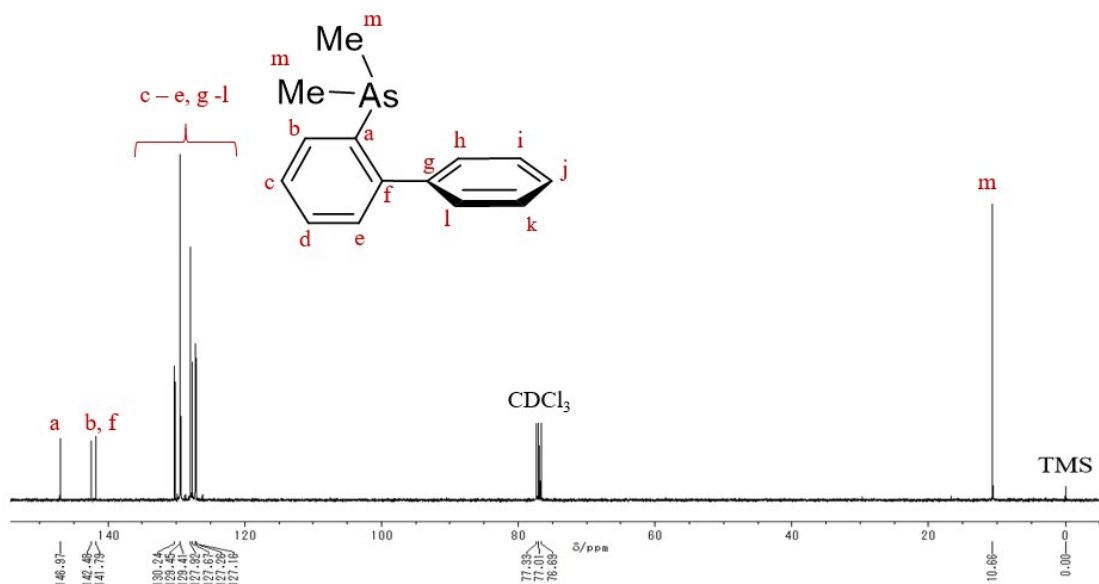

Figure S2. <sup>13</sup>C{<sup>1</sup>H}-NMR spectrum (100 MHz) of L8 in CDCl<sub>3</sub>.

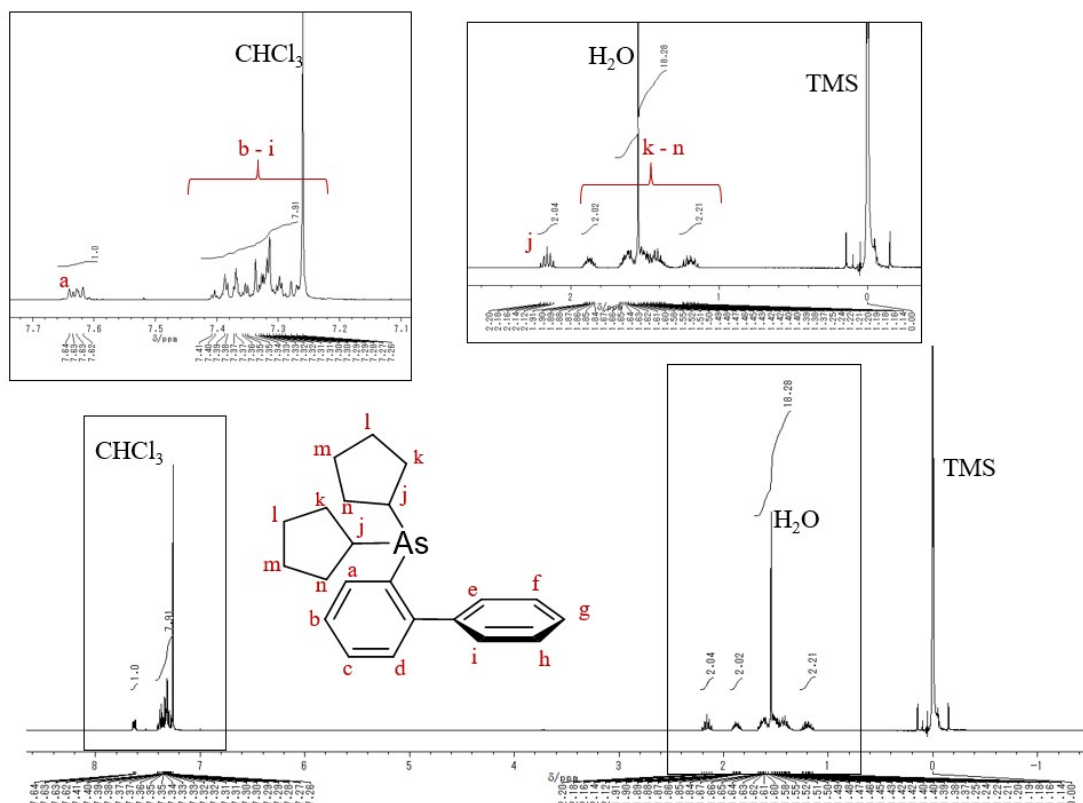

Figure S3.  $^1\text{H-NMR}$  spectrum (400 MHz) of L9 in  $\text{CDCl}_3$ .

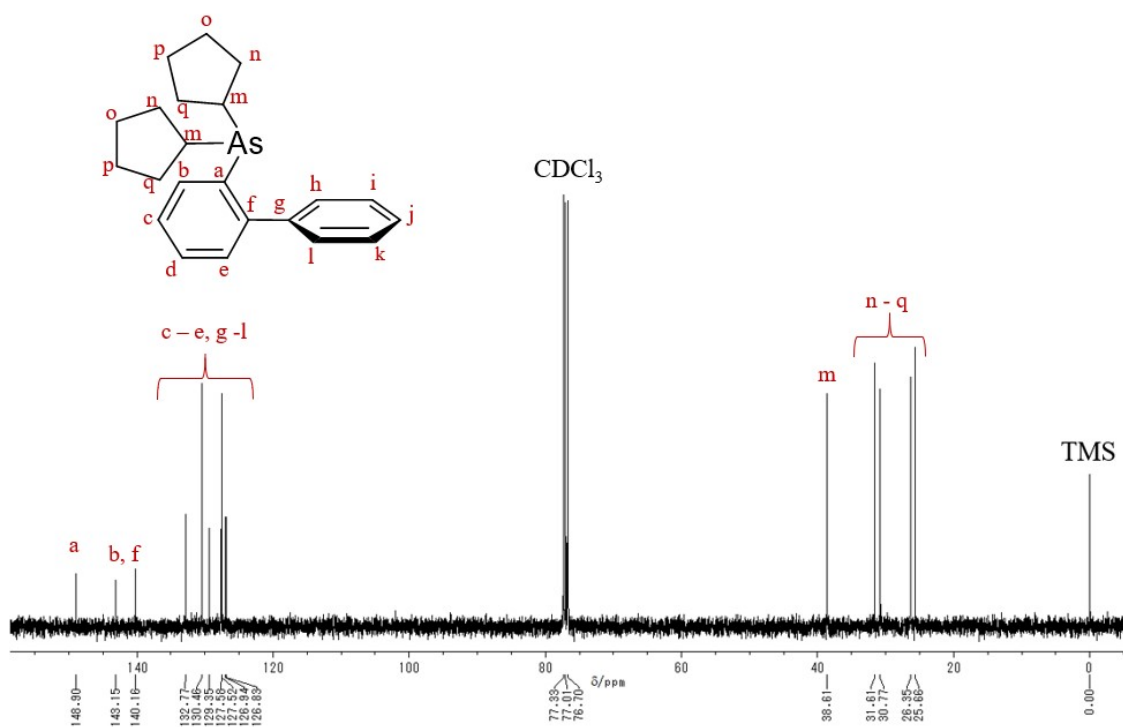

Figure S4.  $^{13}\text{C}\{^1\text{H}\}$ -NMR spectrum (100 MHz) of L9 in  $\text{CDCl}_3$ .

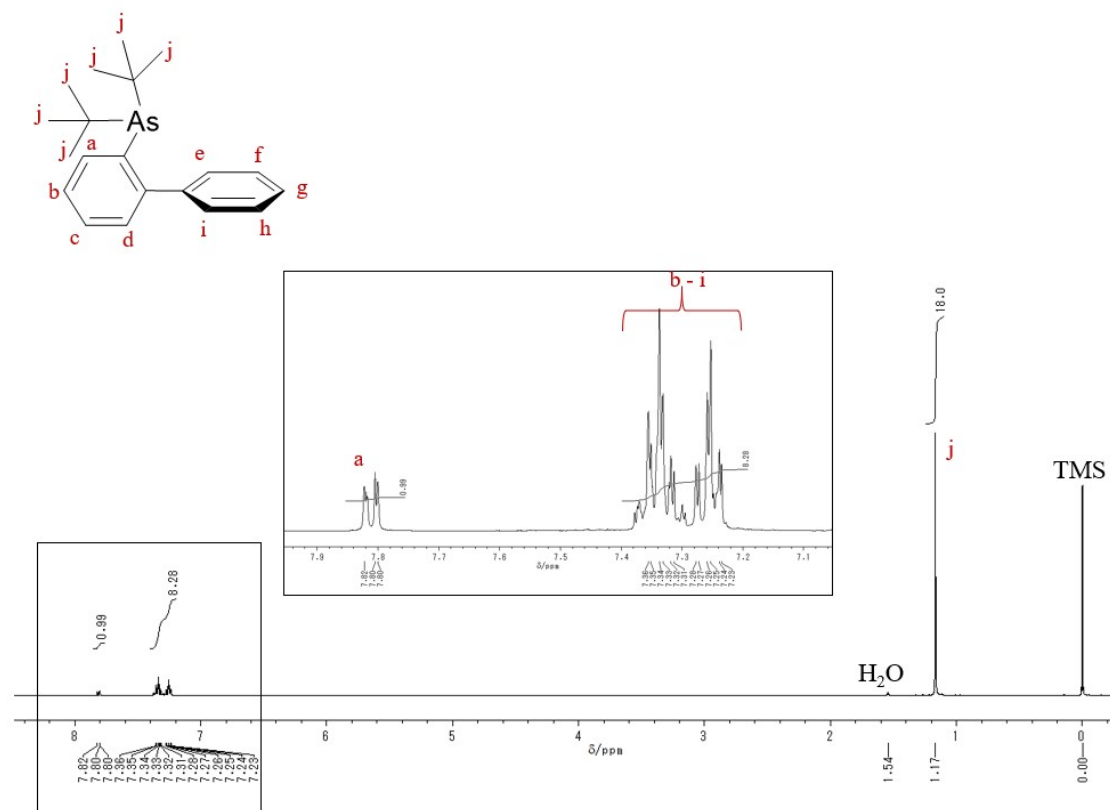

Figure S5.  $^1\text{H}$ -NMR spectrum (400 MHz) of **L10** in  $\text{CDCl}_3$ .

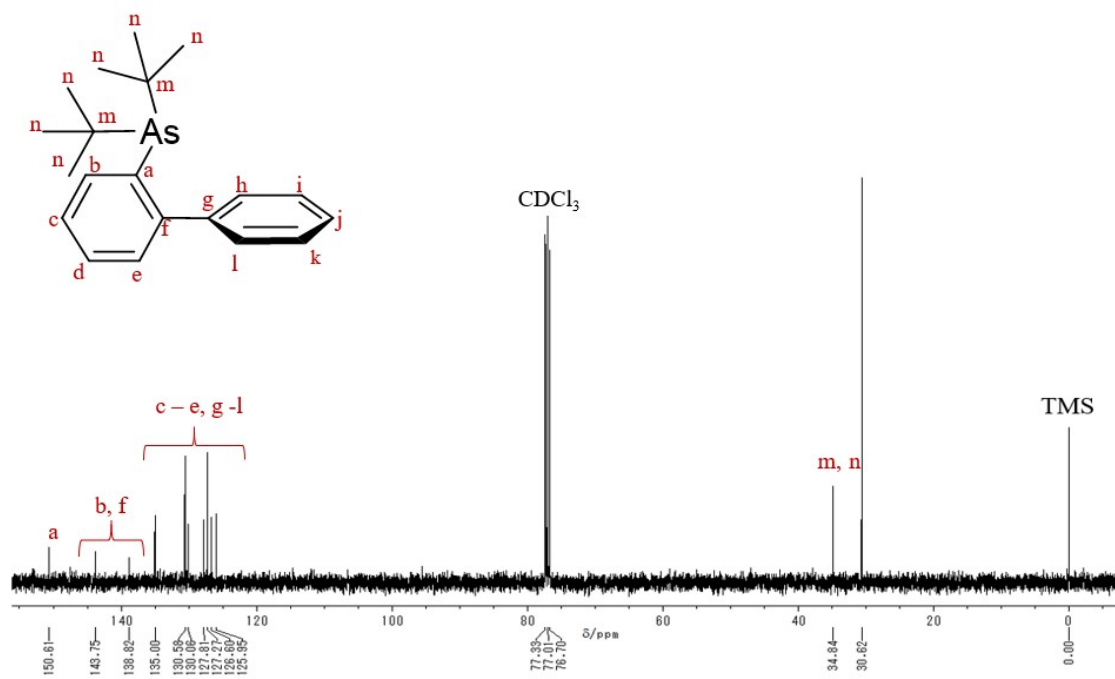

Figure S6.  $^{13}\text{C}\{^1\text{H}\}$ -NMR spectrum (100 MHz) of **L10** in  $\text{CDCl}_3$ .

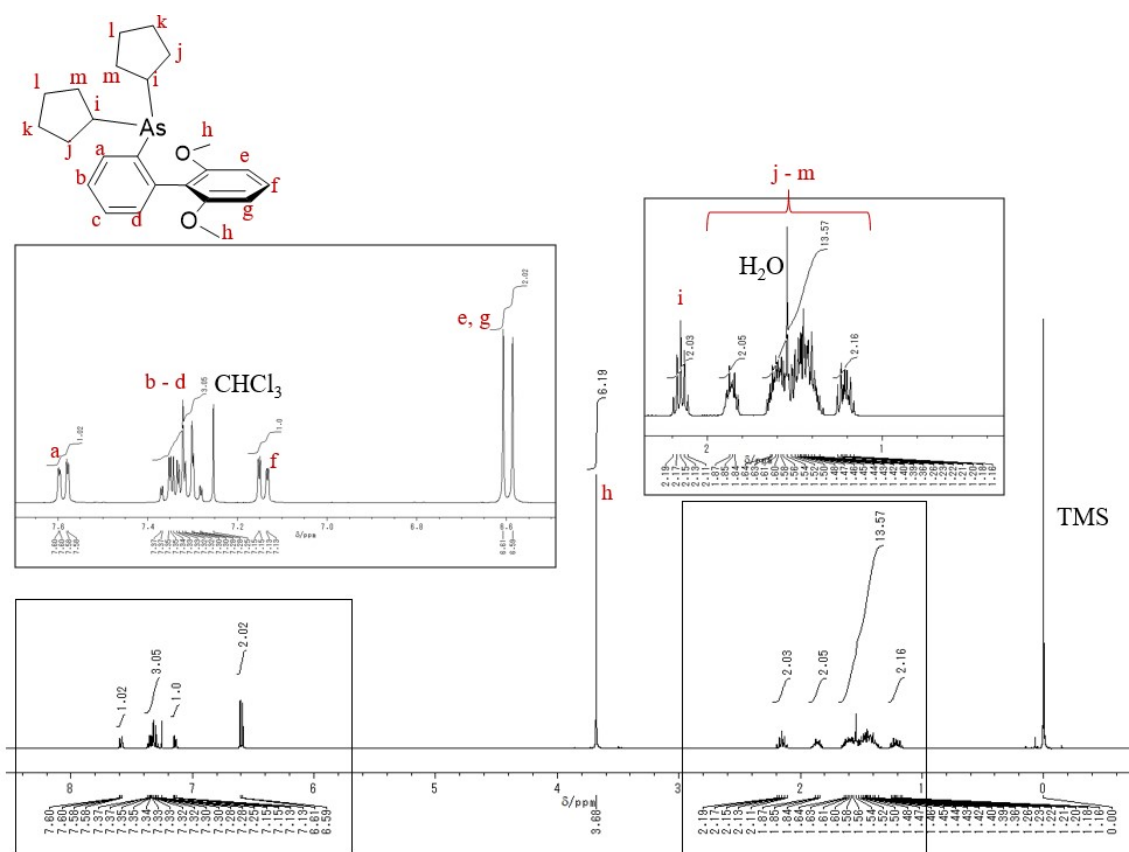

Figure S7.  $^1\text{H-NMR}$  spectrum (400 MHz) of L11 in  $\text{CDCl}_3$ .

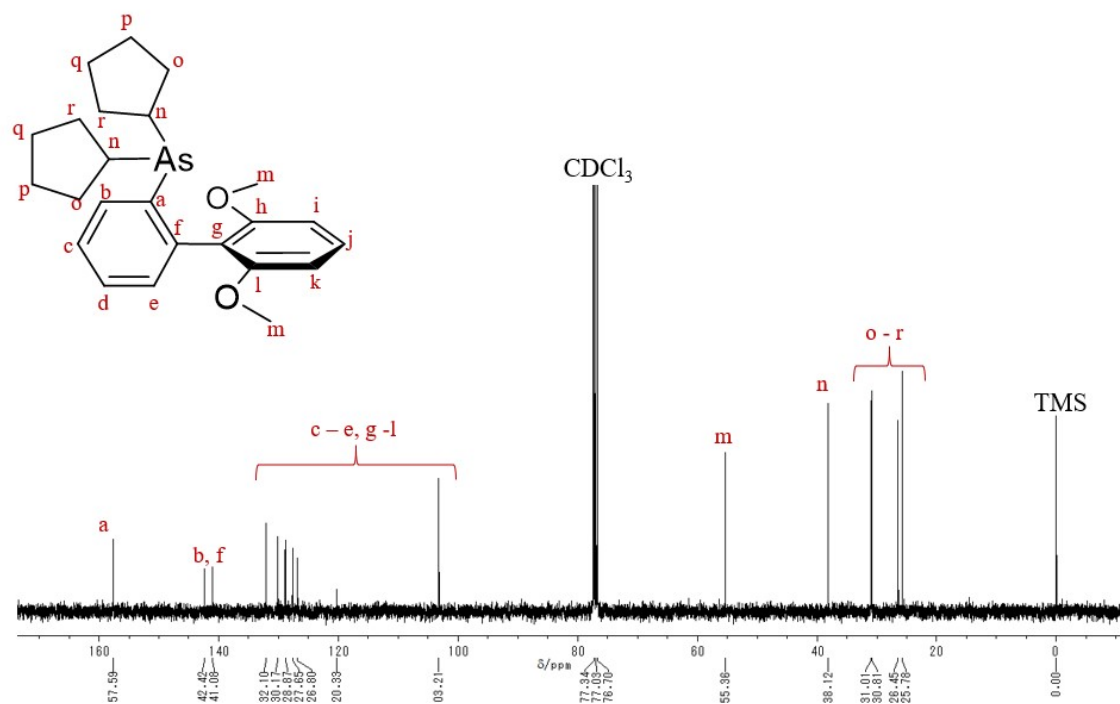

Figure S8.  $^{13}\text{C}\{^1\text{H}\}$ -NMR spectrum (100 MHz) of L11 in  $\text{CDCl}_3$ .

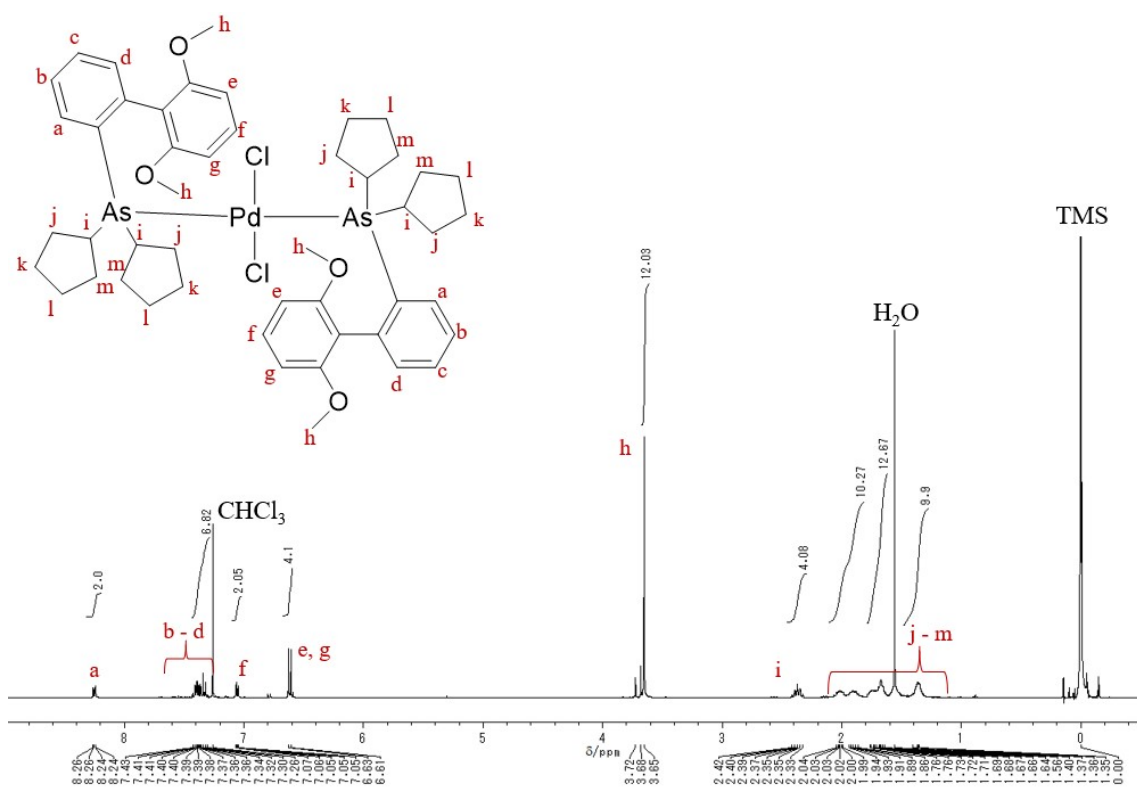

Figure S9.  $^1\text{H-NMR}$  spectrum (400 MHz) of  $[\text{PdCl}_2(\text{L11})_2]$  in  $\text{CDCl}_3$ .

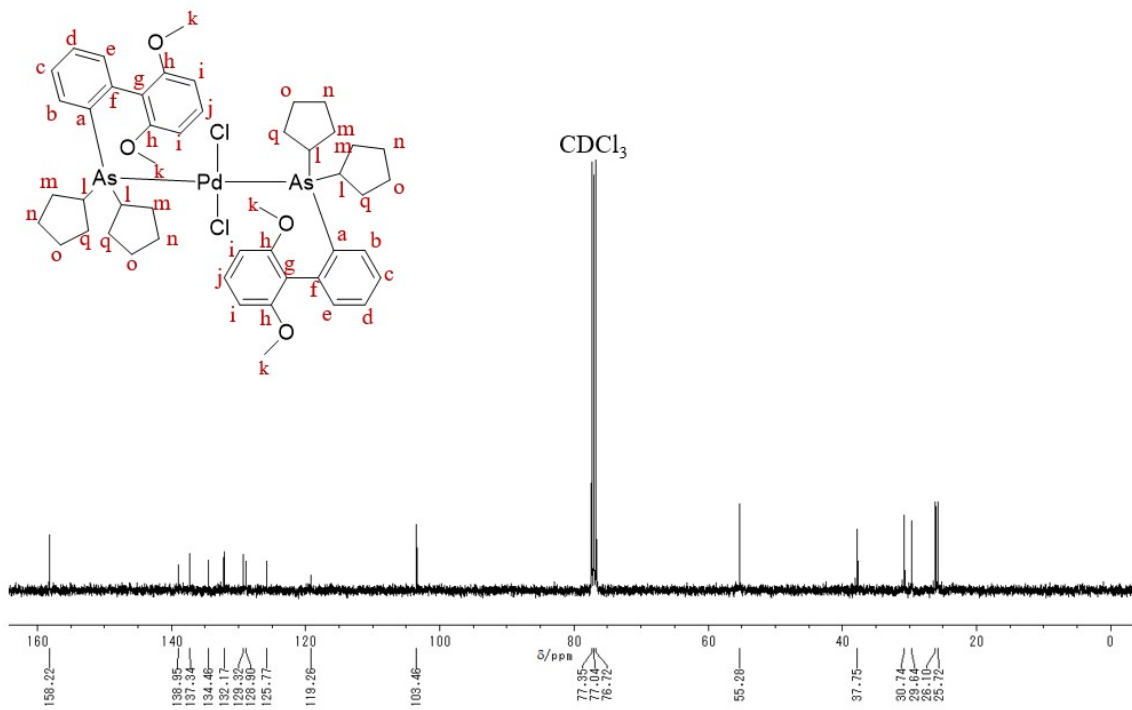

Figure S10.  $^{13}\text{C}\{^1\text{H}\}$ -NMR spectrum (100 MHz) of  $[\text{PdCl}_2(\text{L11})_2]$  in  $\text{CDCl}_3$ .



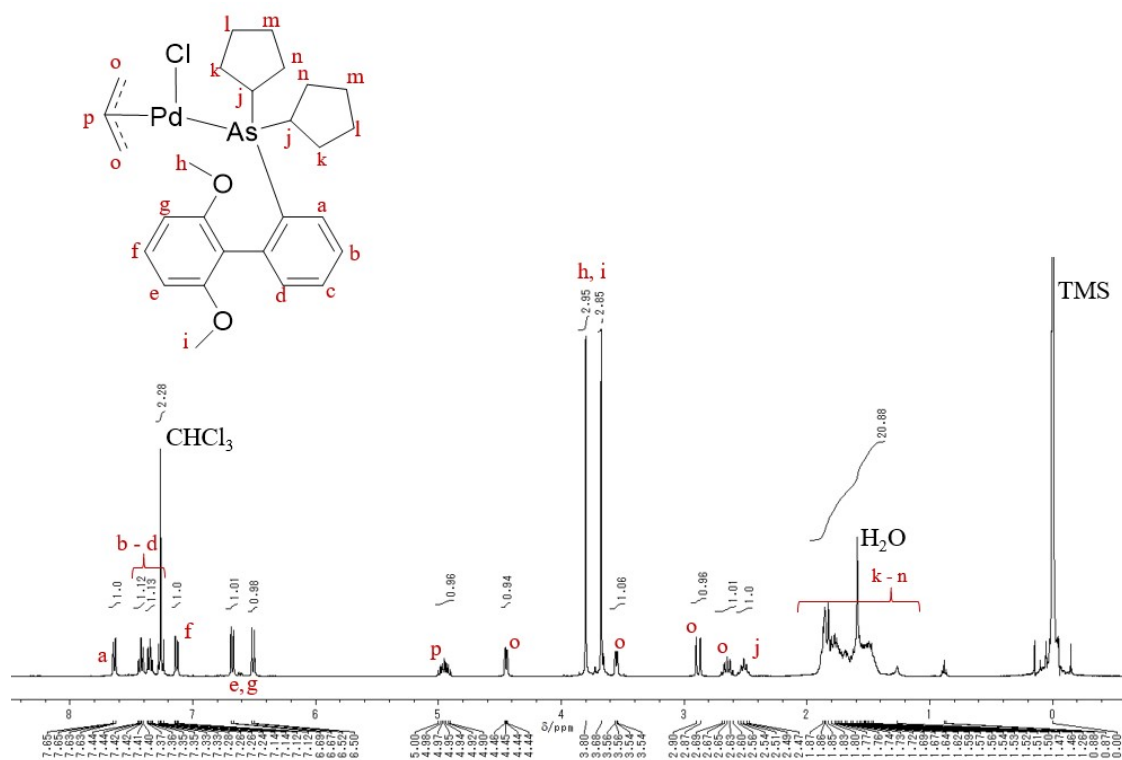

Figure S11.  $^1\text{H-NMR}$  spectrum (400 MHz) of  $[\text{PdCl}(\text{allyl})(\text{L11})]$  in  $\text{CDCl}_3$ .

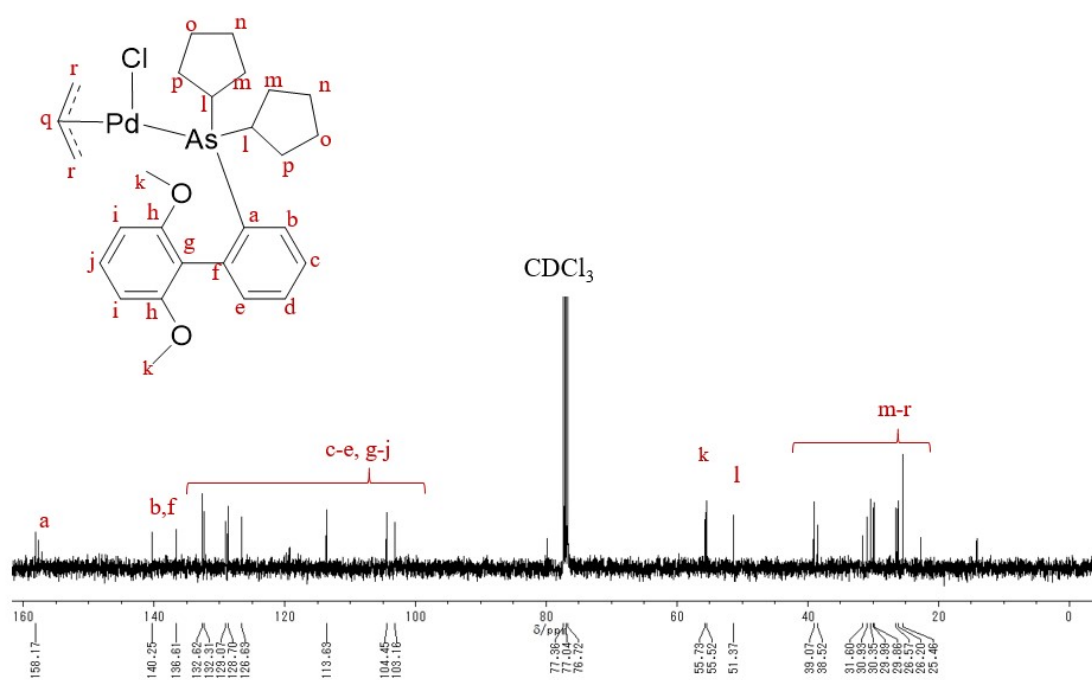

Figure S12.  $^{13}\text{C}\{^1\text{H}\}$ -NMR spectrum (100 MHz) of  $[\text{PdCl}(\text{allyl})(\text{L11})]$  in  $\text{CDCl}_3$ .

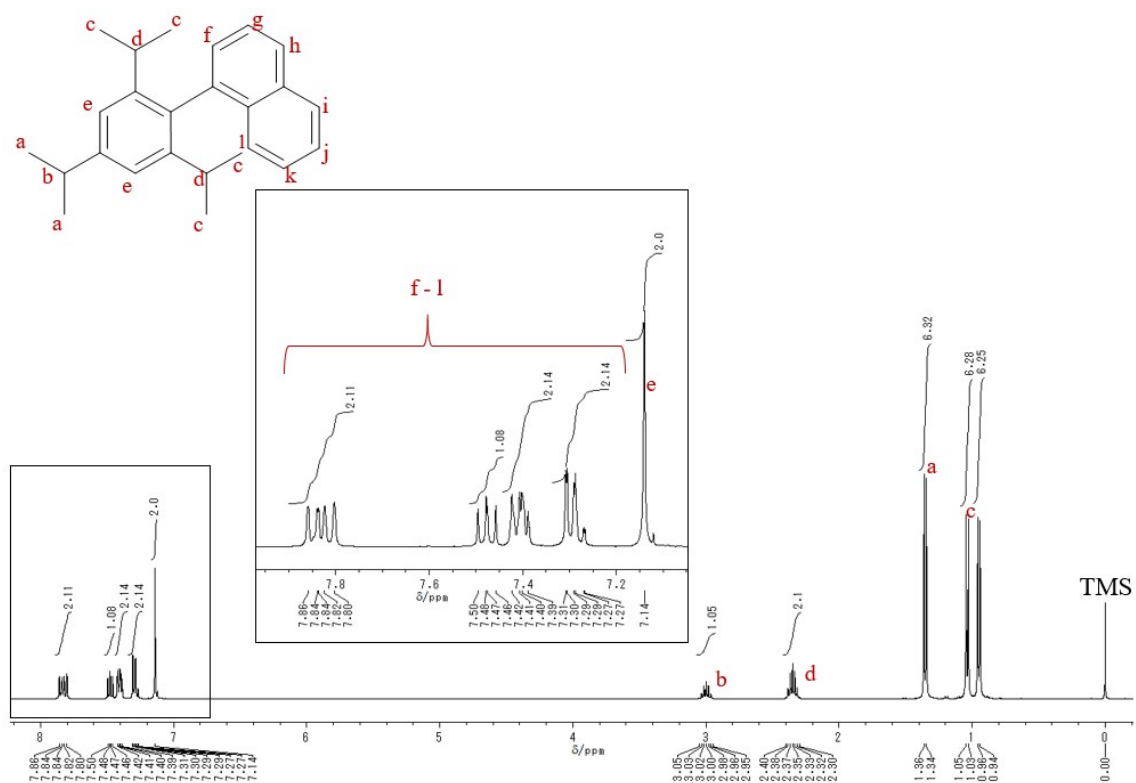

**Figure S13.**  $^1\text{H-NMR}$  spectrum (400 MHz) of **P1** in  $\text{CDCl}_3$ .

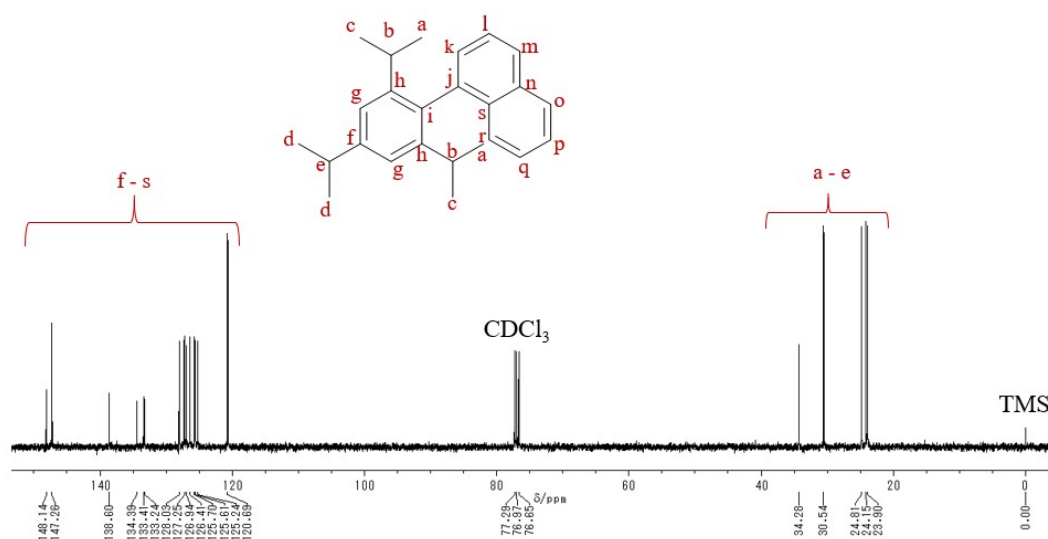

**Figure S14.**  $^{13}\text{C}\{^1\text{H}\}$ -NMR spectrum (100 MHz) of **P1** in  $\text{CDCl}_3$ .

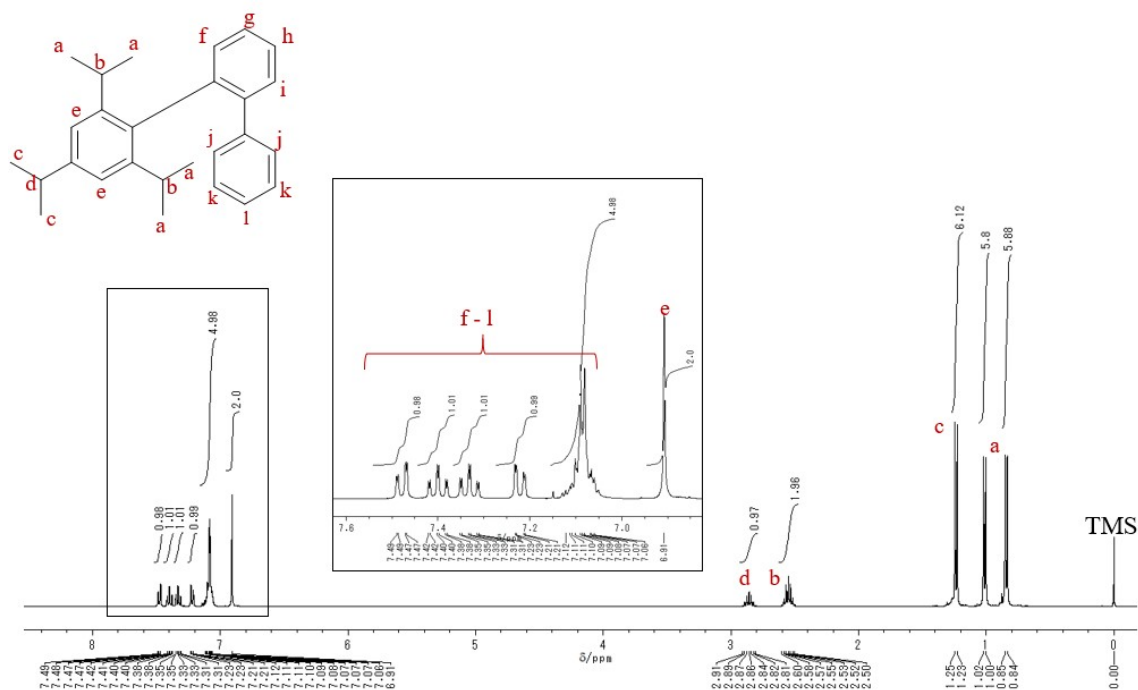

Figure S15.  $^1\text{H}$ -NMR spectrum (400 MHz) of **P2** in  $\text{CDCl}_3$ .

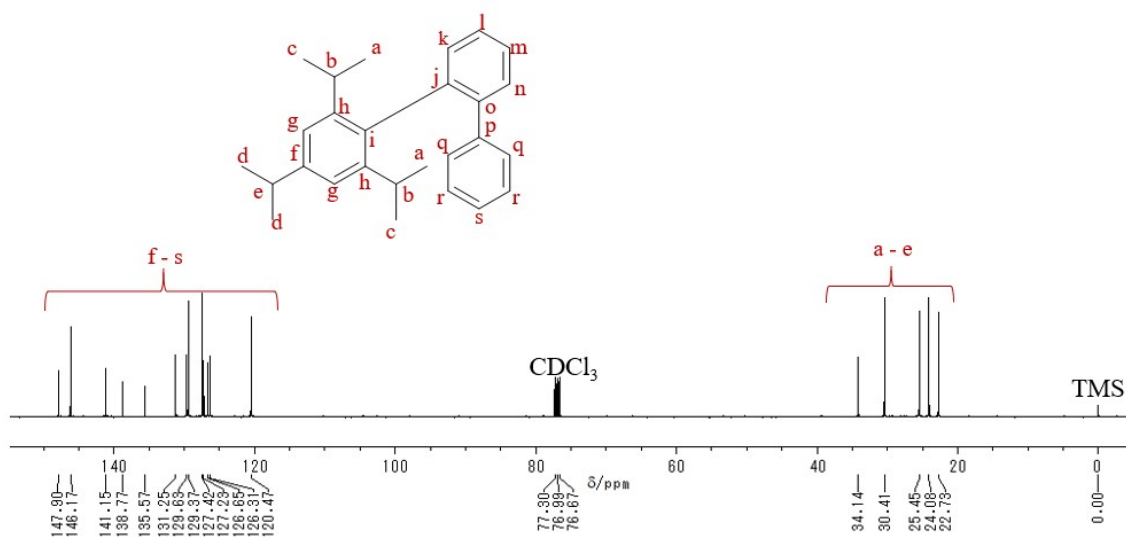

Figure S16.  $^{13}\text{C}\{^1\text{H}\}$ -NMR spectrum (100 MHz) of **P2** in  $\text{CDCl}_3$ .

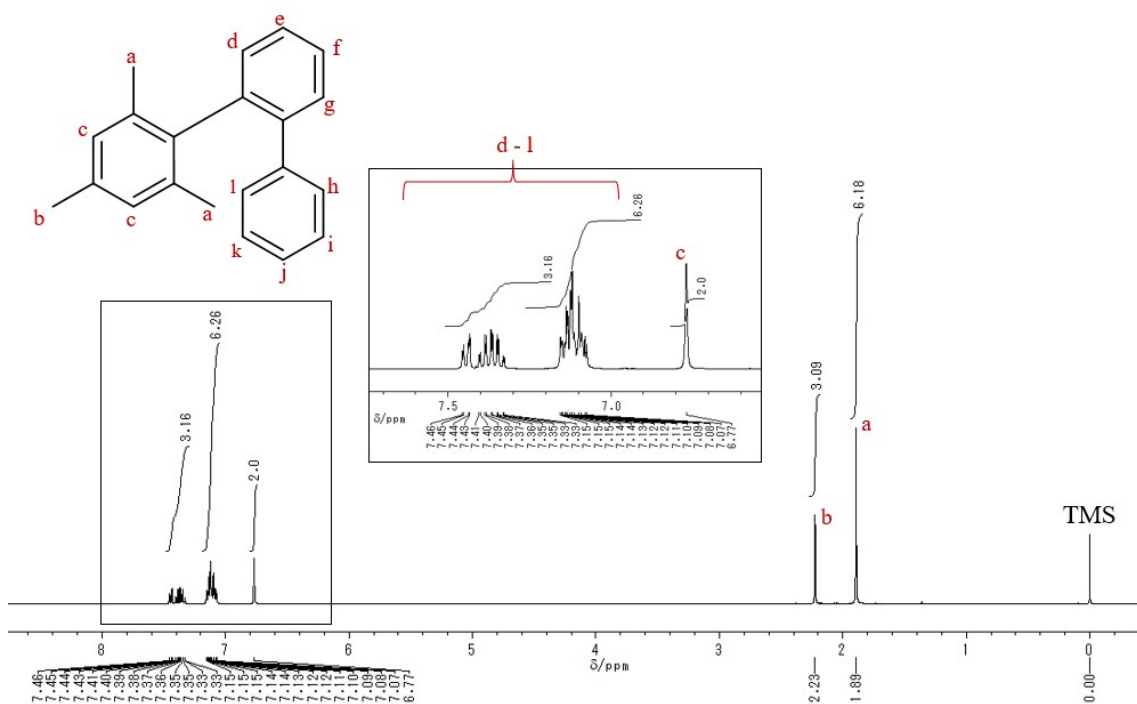

Figure S17.  $^1\text{H-NMR}$  spectrum (400 MHz) of **P3** in  $\text{CDCl}_3$ .

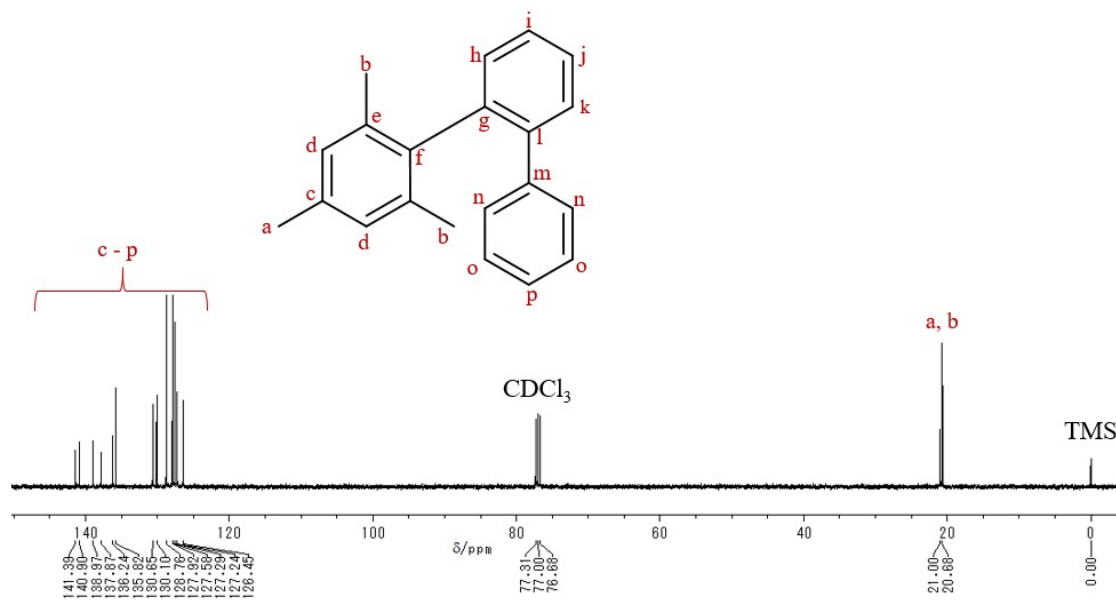

Figure S18.  $^{13}\text{C}\{^1\text{H}\}$ -NMR spectrum (100 MHz) of **P3** in  $\text{CDCl}_3$ .



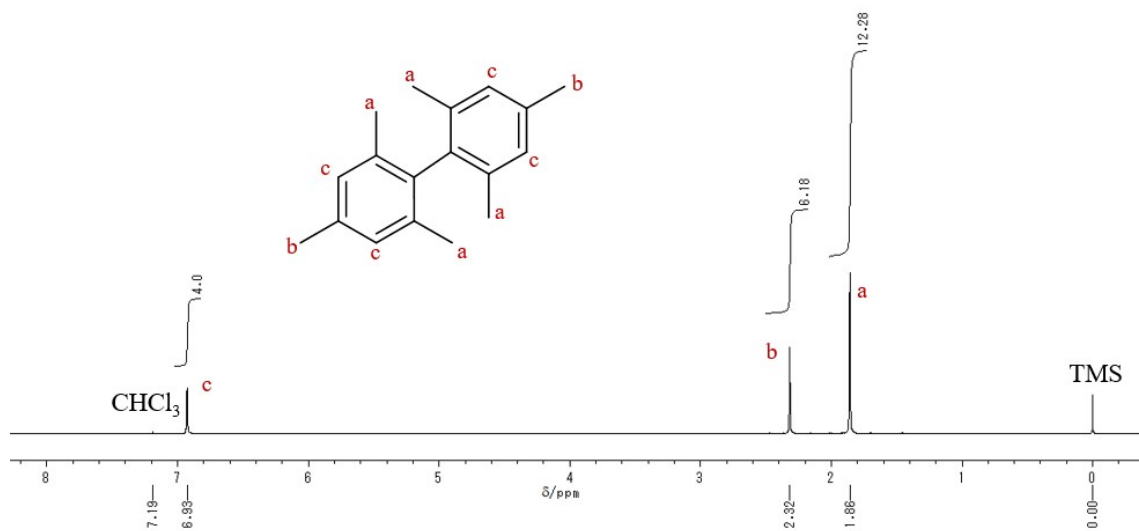

**Figure S21.**  $^1\text{H-NMR}$  spectrum (400 MHz) of **P5** in  $\text{CDCl}_3$ .

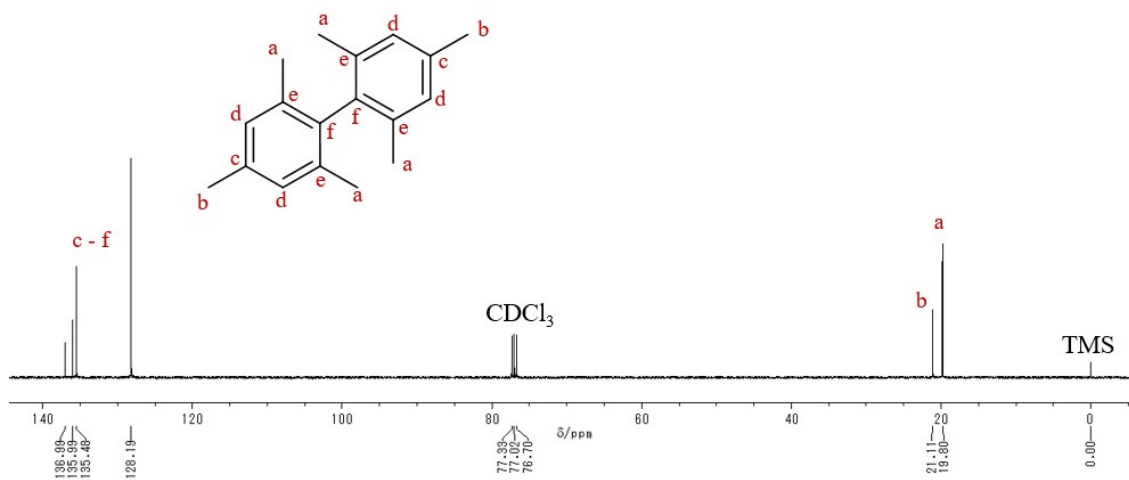

**Figure S22.**  $^{13}\text{C}\{^1\text{H}\}$ -NMR spectrum (100 MHz) of **P5** in  $\text{CDCl}_3$ .

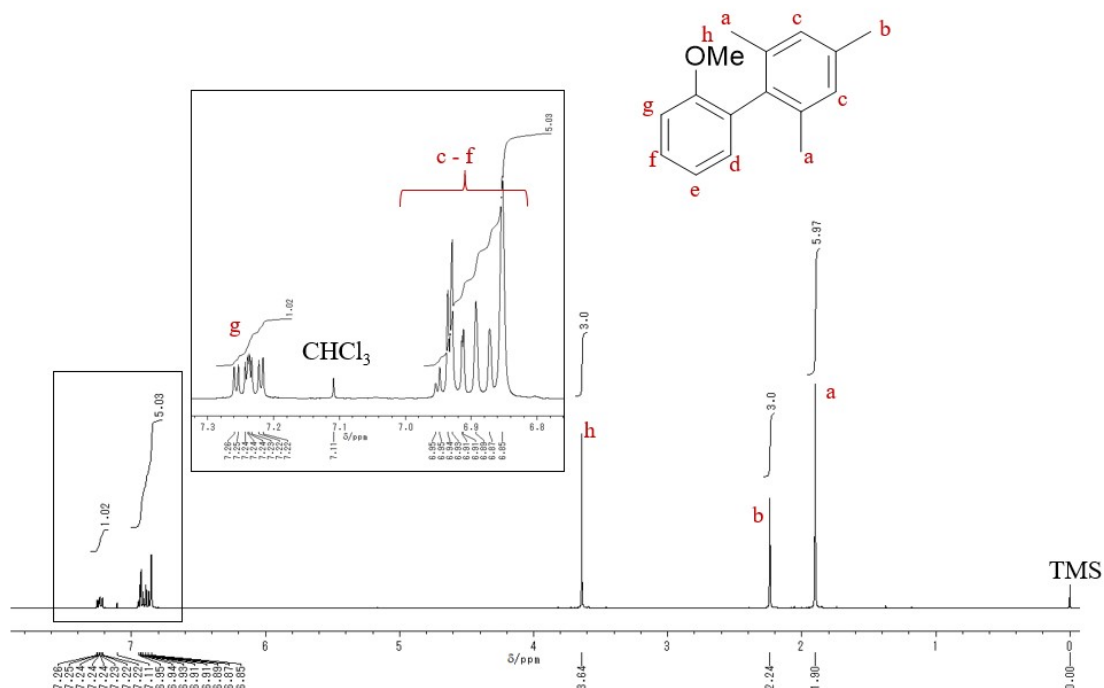

**Figure S23.**  $^1\text{H-NMR}$  spectrum (400 MHz) of **P7** in  $\text{CDCl}_3$ .

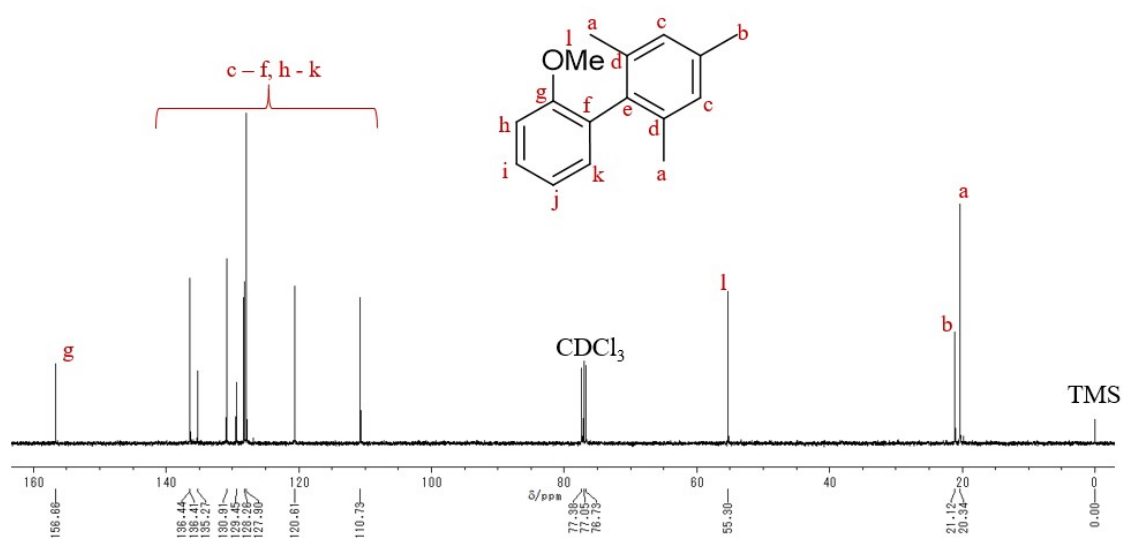

**Figure S24.**  $^{13}\text{C}\{^1\text{H}\}$ -NMR spectrum (100 MHz) of **P7** in  $\text{CDCl}_3$ .

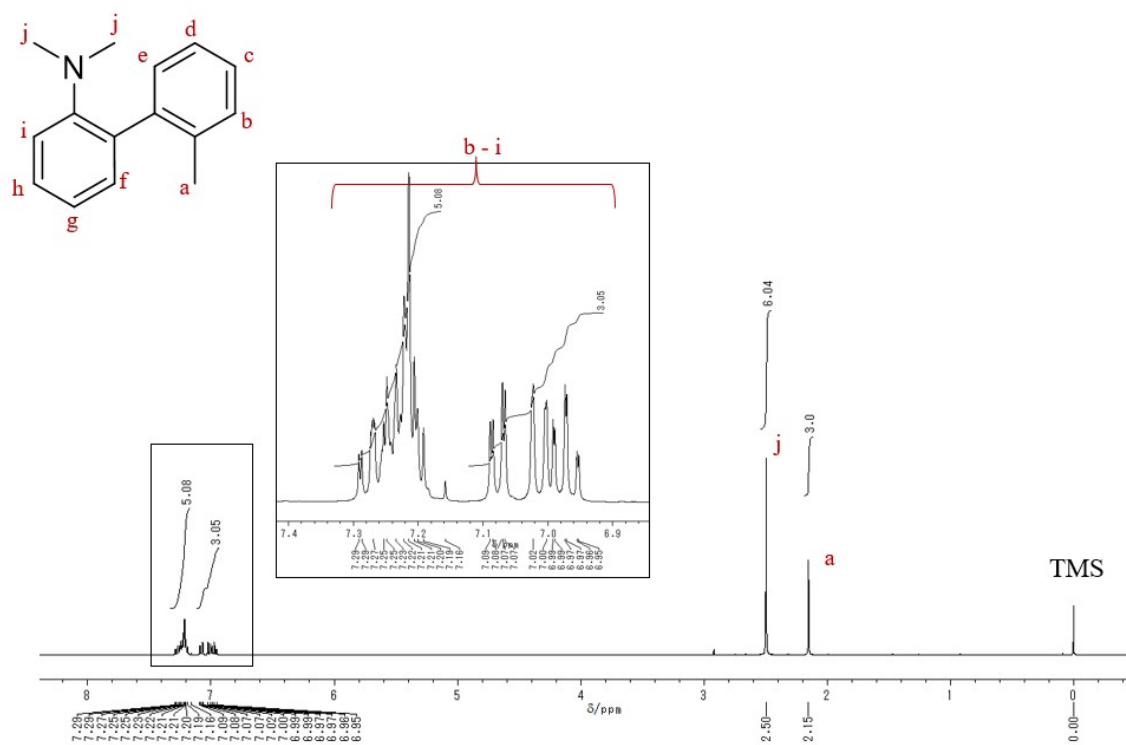

Figure S25.  $^1\text{H-NMR}$  spectrum (400 MHz) of **P8** in  $\text{CDCl}_3$ .

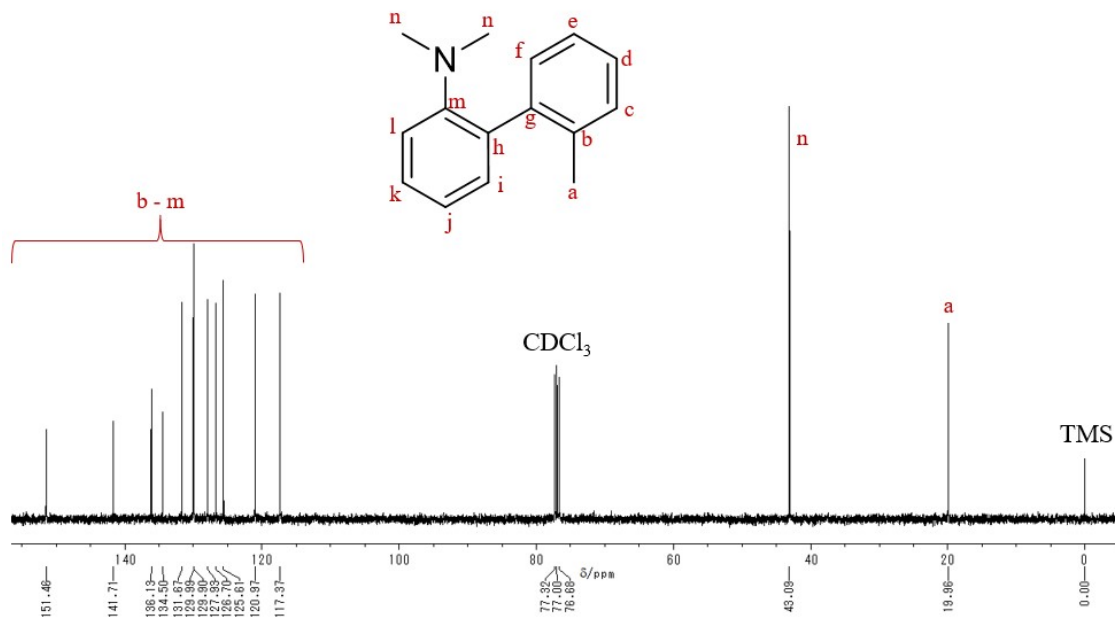

Figure S26.  $^{13}\text{C}\{^1\text{H}\}$ -NMR spectrum (100 MHz) of **P8** in  $\text{CDCl}_3$ .



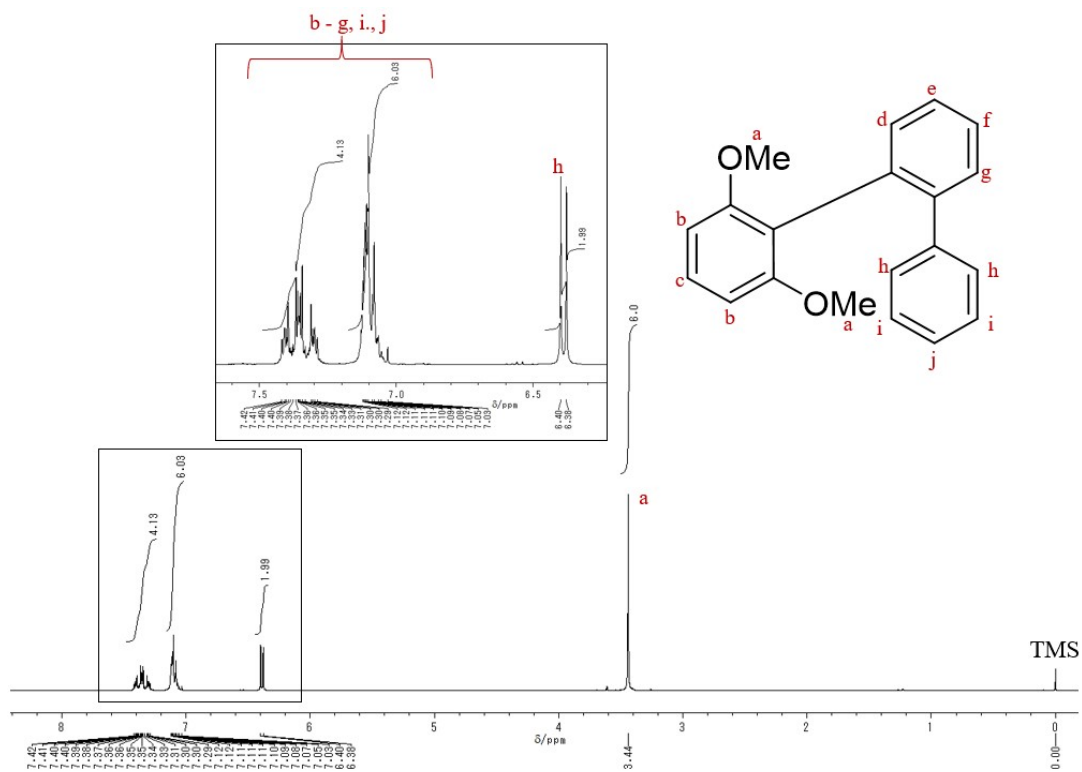

Figure S27.  $^1\text{H-NMR}$  spectrum (400 MHz) of **P9** in  $\text{CDCl}_3$ .

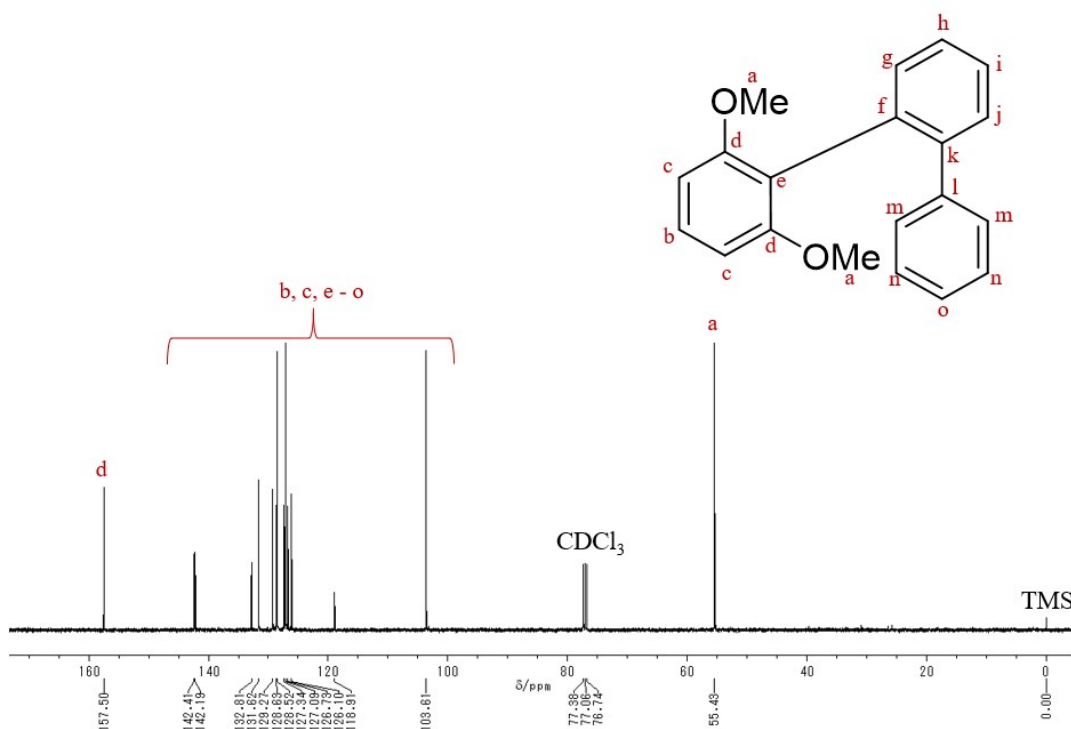

Figure S28.  $^{13}\text{C}\{^1\text{H}\}$ -NMR spectrum (100 MHz) of **P9** in  $\text{CDCl}_3$ .

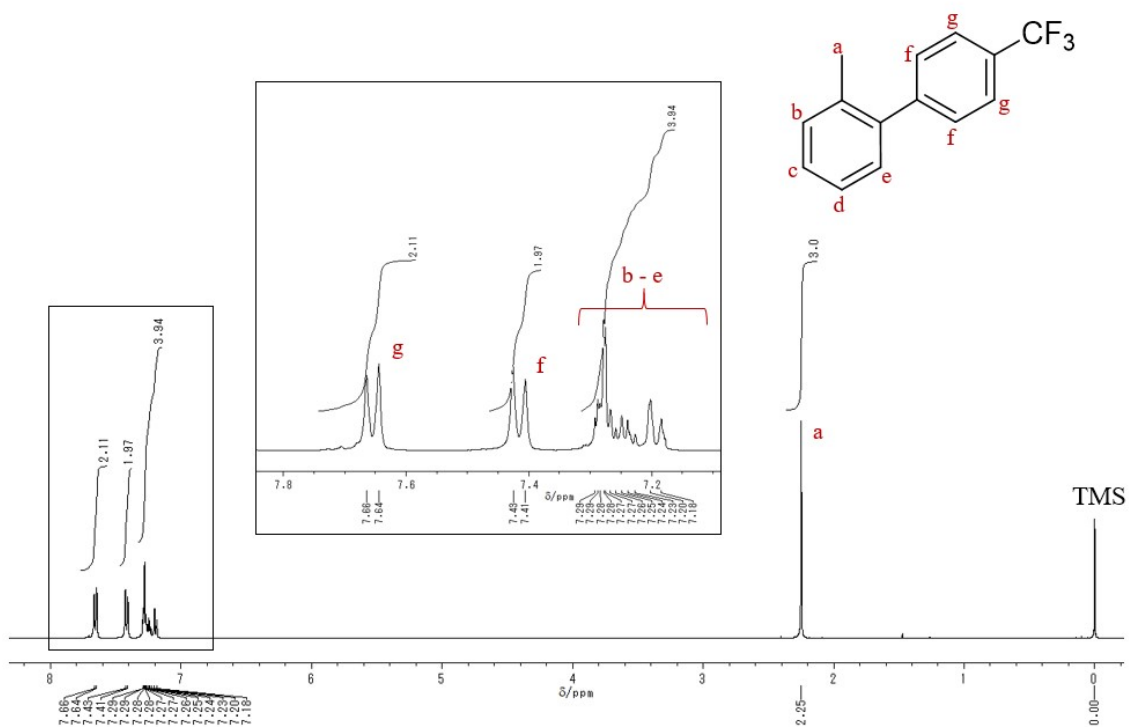

Figure S29.  $^1\text{H-NMR}$  spectrum (400 MHz) of **P11** in  $\text{CDCl}_3$ .

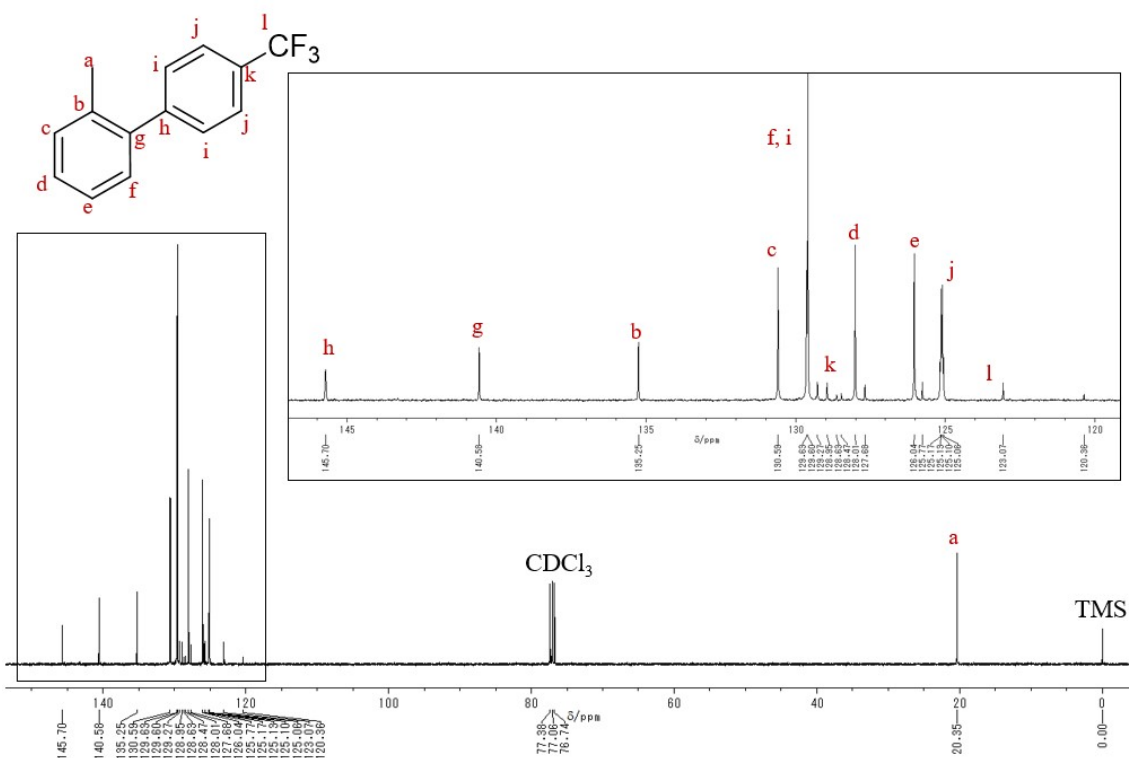

Figure S30.  $^{13}\text{C}\{^1\text{H}\}$ -NMR spectrum (100 MHz) of **P11** in  $\text{CDCl}_3$ .

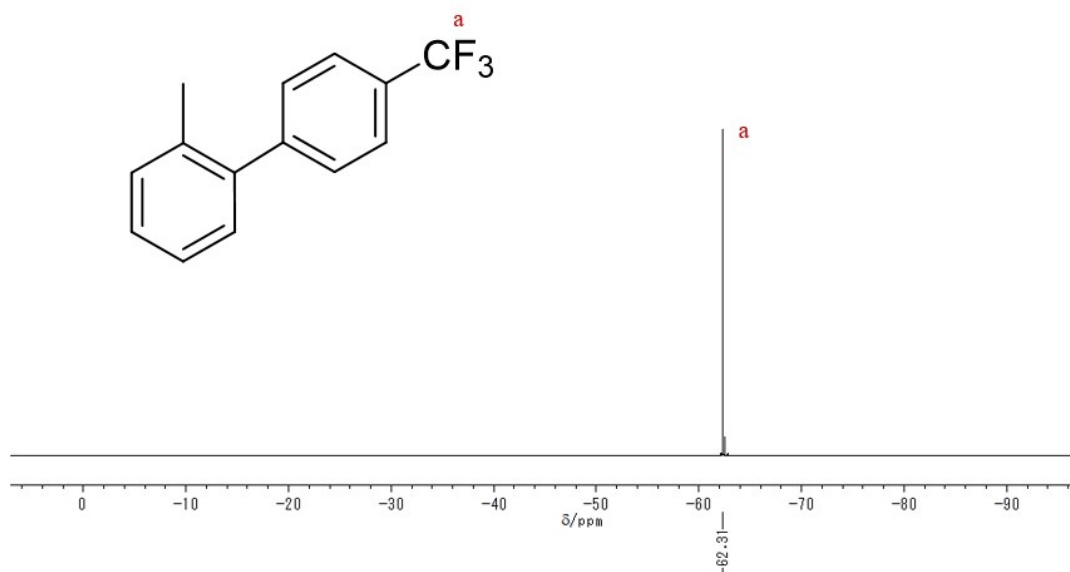

**Figure S31.**  $^{19}\text{F}$ -NMR spectrum (376 MHz) of **P11** in  $\text{CDCl}_3$ .

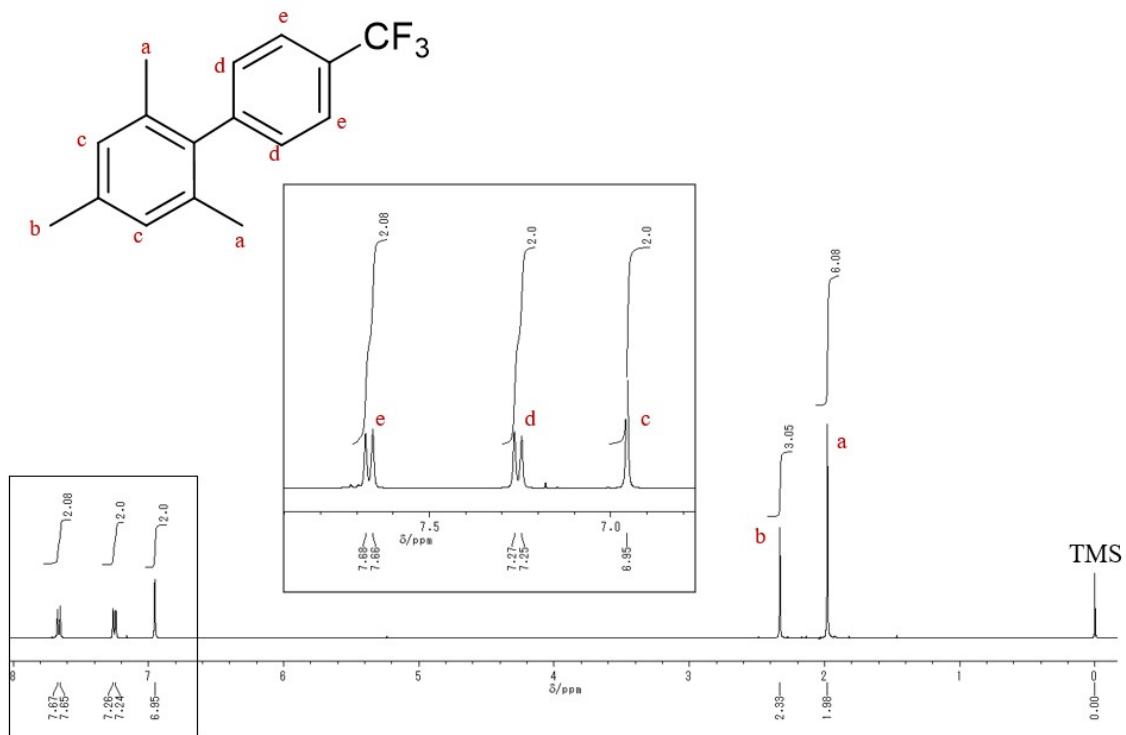

**Figure S32.**  $^1\text{H}$ -NMR spectrum (400 MHz) of **P12** in  $\text{CDCl}_3$ .

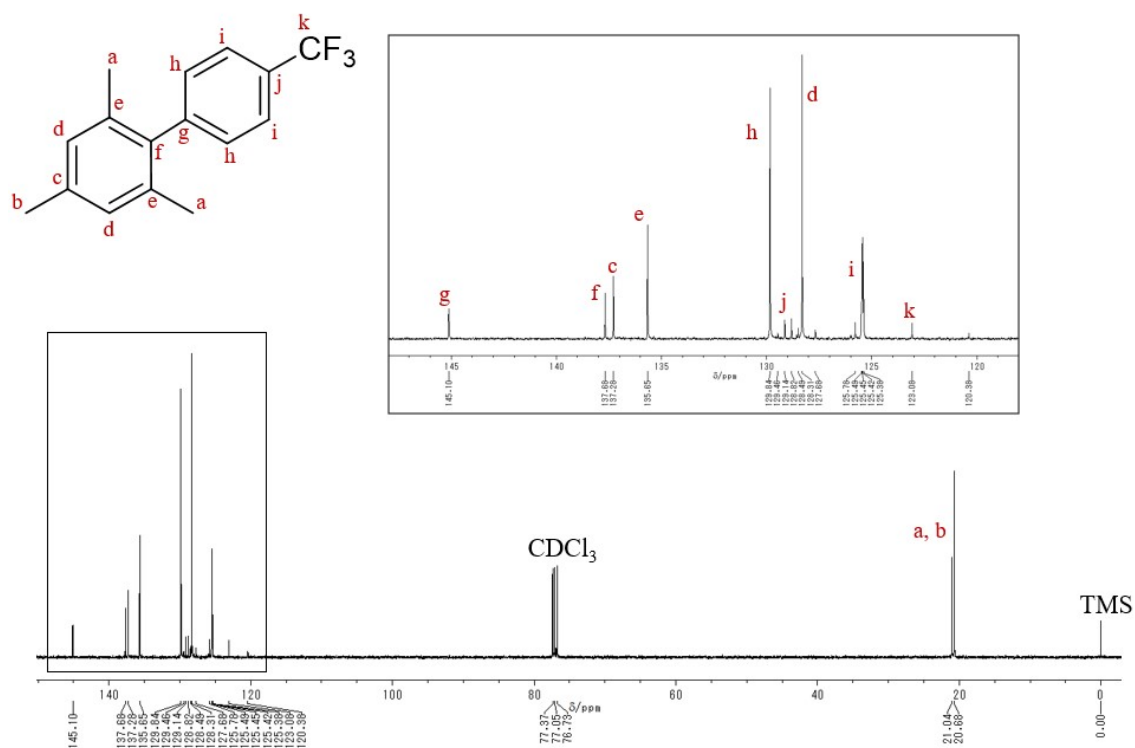

**Figure S33.**  $^{13}\text{C}\{^1\text{H}\}$ -NMR spectrum (100 MHz) of **P12** in  $\text{CDCl}_3$ .

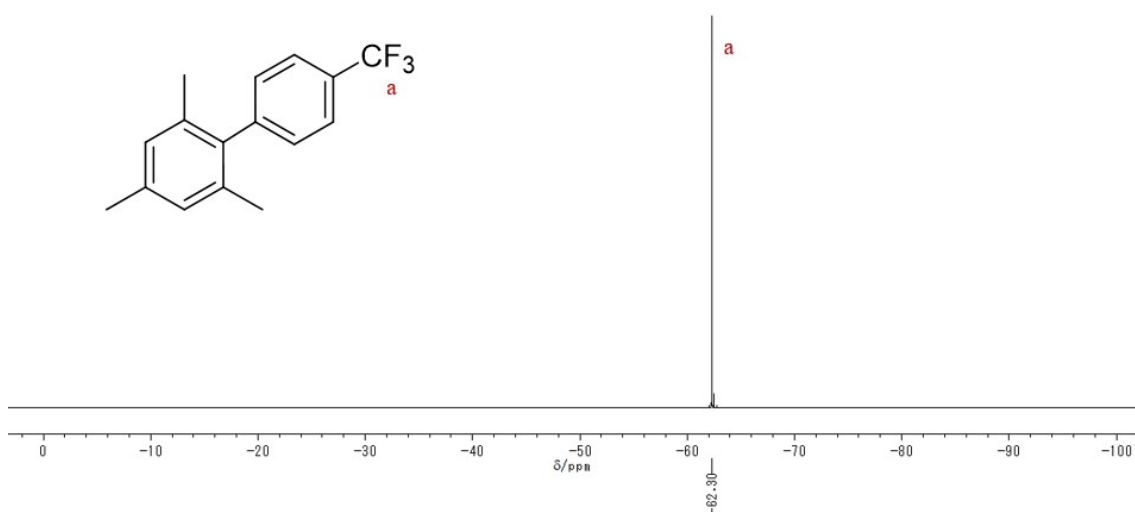

**Figure S34.**  $^{19}\text{F}$ -NMR spectrum (376 MHz) of **P12** in  $\text{CDCl}_3$ .

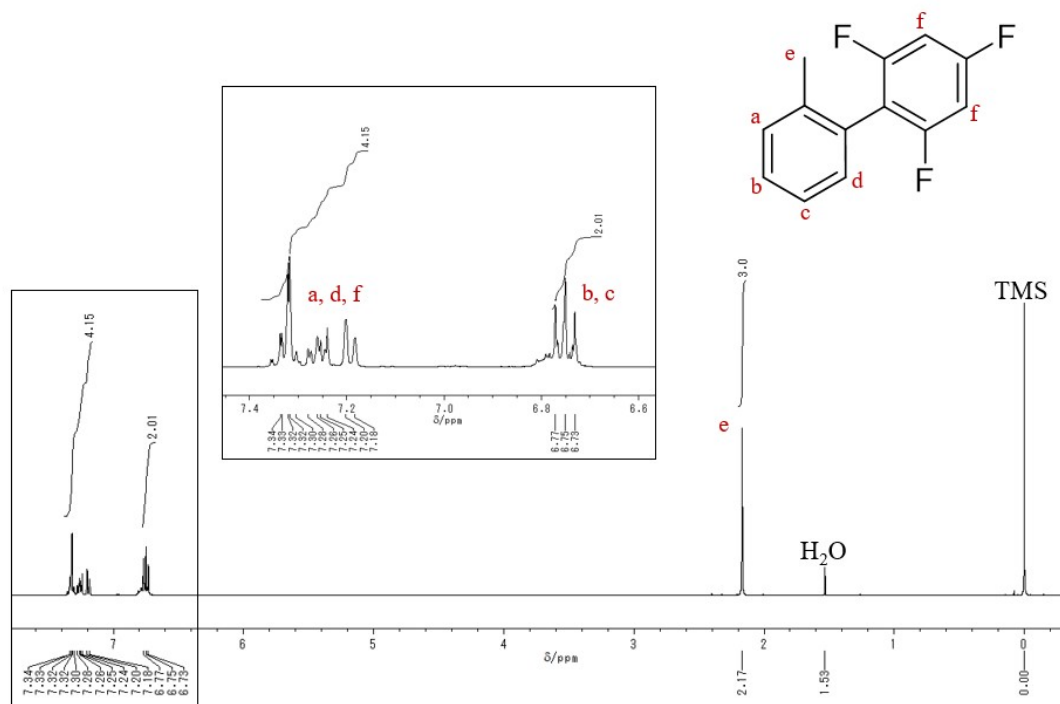

Figure S35.  $^1\text{H-NMR}$  spectrum (400 MHz) of P13 in  $\text{CDCl}_3$ .

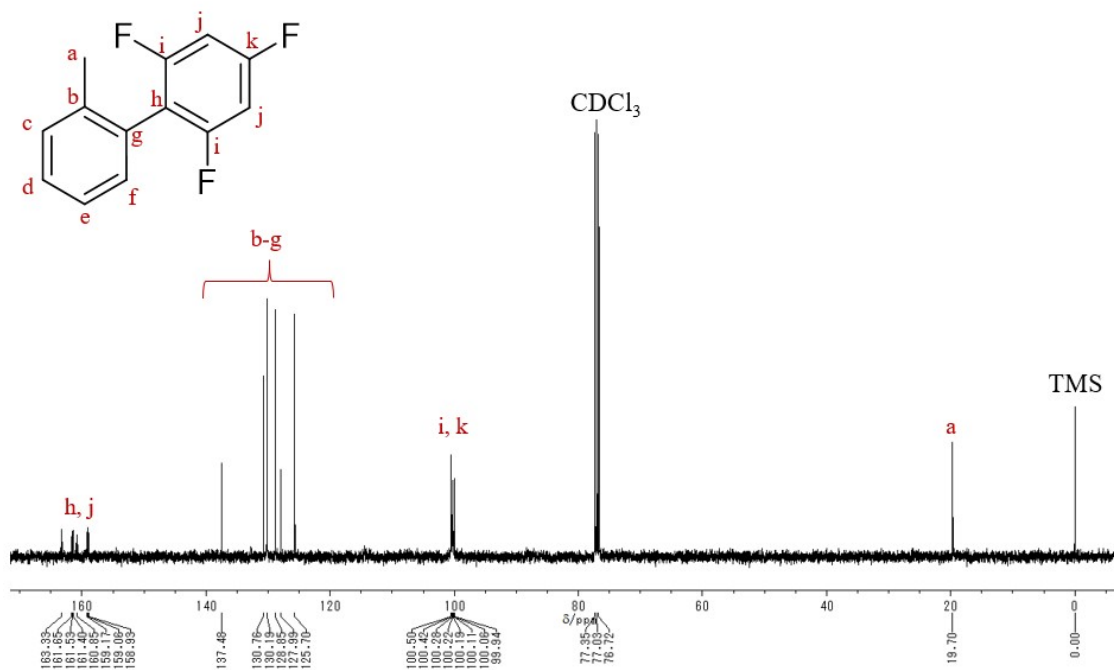

Figure S36.  $^{13}\text{C}\{^1\text{H}\}$ -NMR spectrum (100 MHz) of P13 in  $\text{CDCl}_3$ .

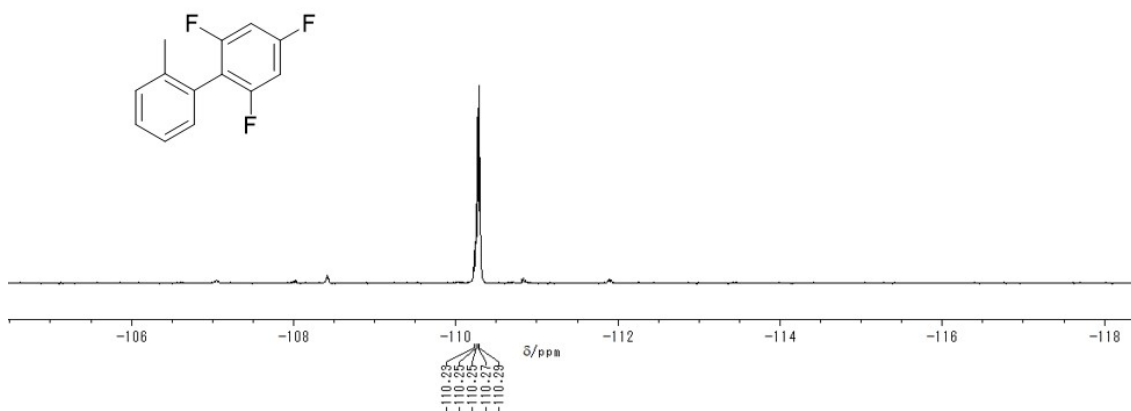

**Figure S37.**  $^{19}\text{F}$ -NMR spectrum (376 MHz) of **P13** in  $\text{CDCl}_3$ .

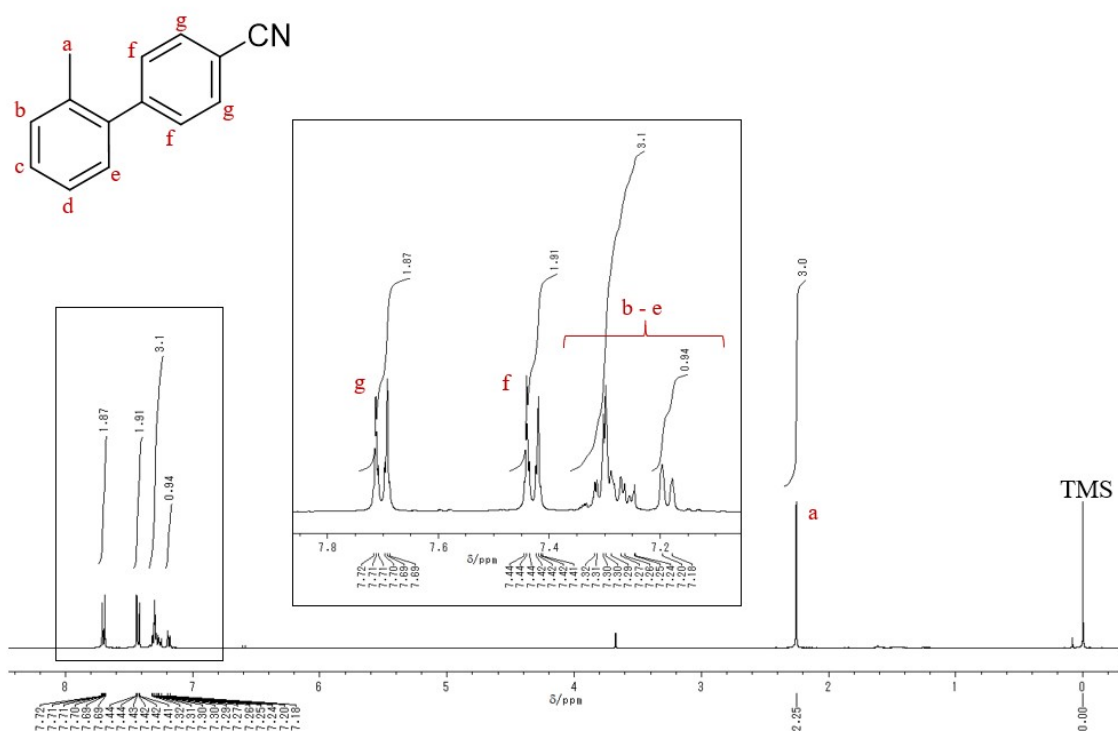

**Figure S38.**  $^1\text{H}$ -NMR spectrum (400 MHz) of **P14** in  $\text{CDCl}_3$ .

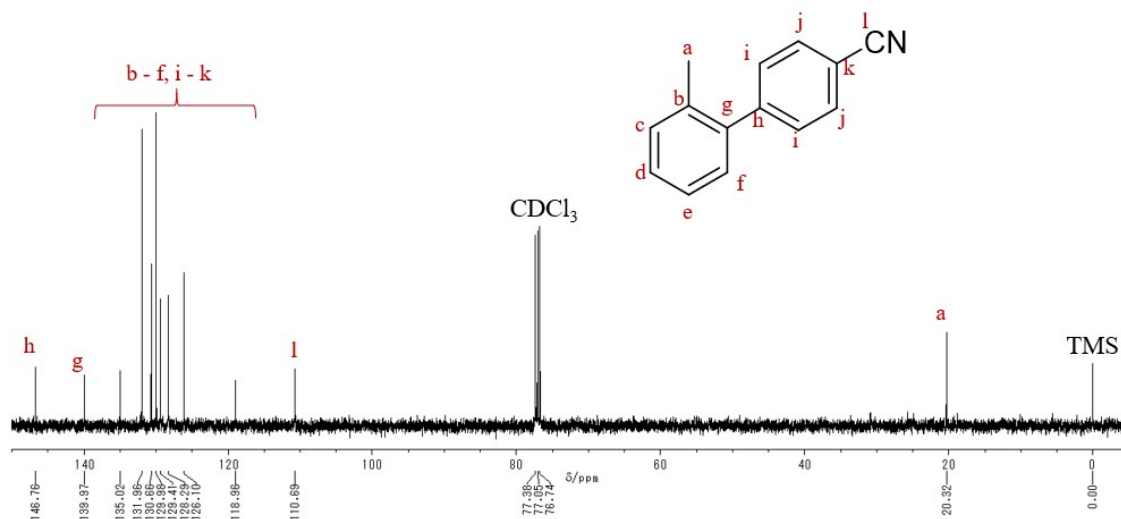

**Figure S39.**  $^{13}\text{C}\{^1\text{H}\}$ -NMR spectrum (100 MHz) of **P14** in  $\text{CDCl}_3$ .

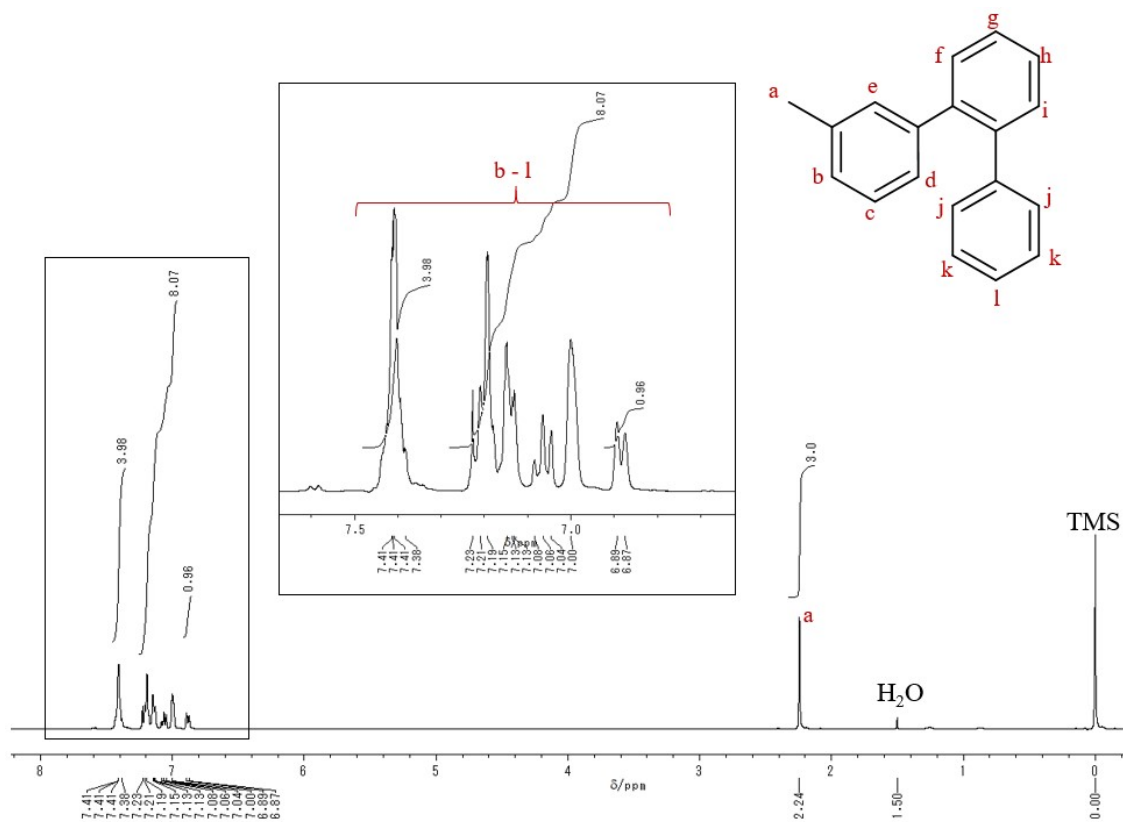

**Figure S40.**  $^1\text{H}$ -NMR spectrum (400 MHz) of **P16** in  $\text{CDCl}_3$ .

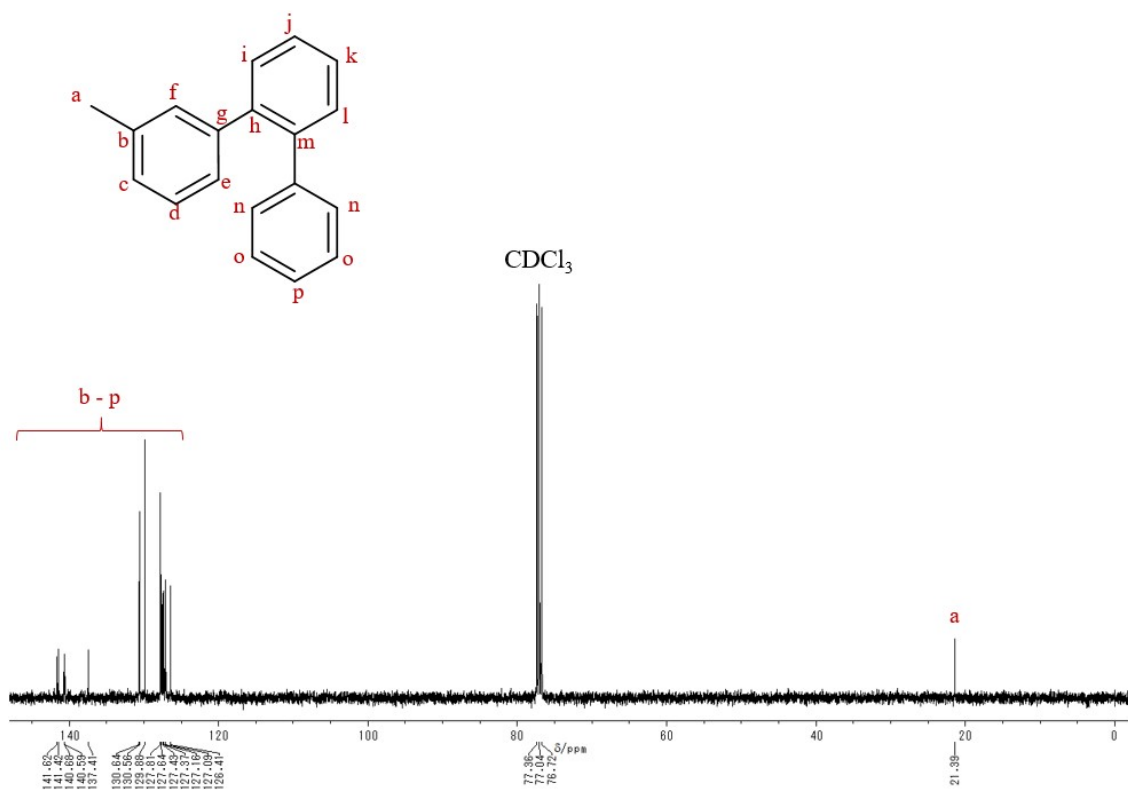

Figure S41.  $^{13}\text{C}\{^1\text{H}\}$ -NMR spectrum (100 MHz) of P16 in  $\text{CDCl}_3$ .

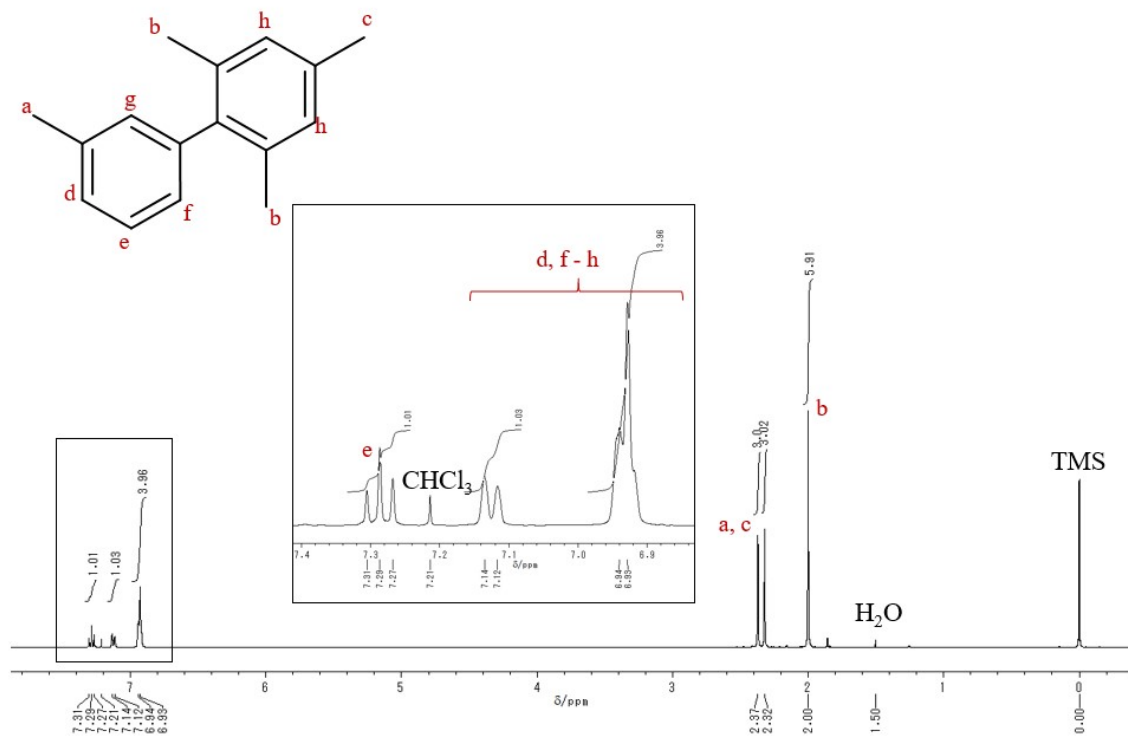

Figure S42.  $^1\text{H}$ -NMR spectrum (400 MHz) of P17 in  $\text{CDCl}_3$ .



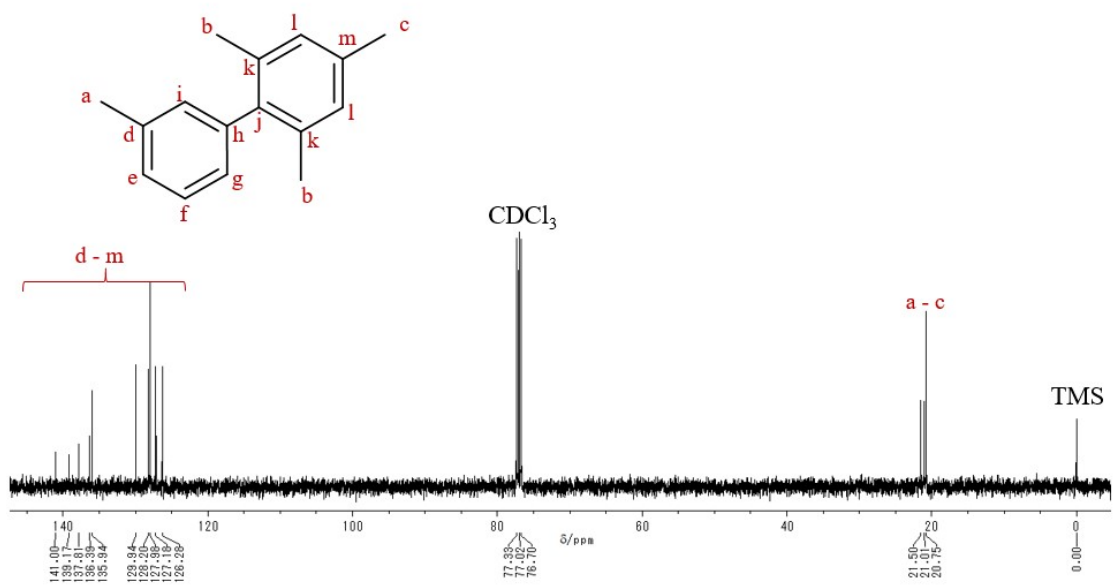

**Figure S43.**  $^{13}\text{C}\{^1\text{H}\}$ -NMR spectrum (100 MHz) of **P17** in  $\text{CDCl}_3$ .

## 5. Crystallographic data

**Table S1.** Crystallographic data of [PdCl<sub>2</sub>(L6)<sub>2</sub>] and [PdCl<sub>2</sub>(L11)<sub>2</sub>] measured at -180 °C.

| Crystal data                            | [PdCl <sub>2</sub> (L6) <sub>2</sub> ]                                             | [PdCl <sub>2</sub> (L11) <sub>2</sub> ]                                           |
|-----------------------------------------|------------------------------------------------------------------------------------|-----------------------------------------------------------------------------------|
| Empirical Formula                       | C <sub>53</sub> H <sub>720</sub> As <sub>2</sub> Cl <sub>4</sub> O <sub>4</sub> Pd | C <sub>50</sub> H <sub>66</sub> As <sub>2</sub> Cl <sub>6</sub> O <sub>4</sub> Pd |
| Formula Weight                          | 1171.14                                                                            | 1199.96                                                                           |
| Crystal Dimension, mm <sup>3</sup>      | 0.54 × 0.31 × 0.22                                                                 | 0.549 × 0.327 × 0.252                                                             |
| Crystal System                          | triclinic                                                                          | triclinic                                                                         |
| Space Group                             | <i>P</i> -1                                                                        | <i>P</i> -1                                                                       |
| a, Å                                    | 10.8964(4)                                                                         | 11.4318(8)                                                                        |
| b, Å                                    | 10.9483(5)                                                                         | 11.5359(5)                                                                        |
| c, Å                                    | 23.182(1)                                                                          | 11.5689(6)                                                                        |
| α, deg                                  | 86.695(4)                                                                          | 83.456(4)                                                                         |
| β, deg                                  | 83.153(3)                                                                          | 63.747(6)                                                                         |
| γ, deg                                  | 80.496(3)                                                                          | 80.103(5)                                                                         |
| Volume, Å <sup>3</sup>                  | 2706.0(2)                                                                          | 1346.68(15)                                                                       |
| D <sub>calcd</sub> , g cm <sup>-3</sup> | 1.437                                                                              | 1.480                                                                             |
| Z                                       | 2                                                                                  | 1                                                                                 |
| F(000)                                  | 1204.0                                                                             | 612.0                                                                             |
| Data Collection                         |                                                                                    |                                                                                   |
| Temperature, deg                        | -180                                                                               | -180                                                                              |
| 2θmax, deg.                             | 52.744                                                                             | 52.742                                                                            |
| Tmin/Tmax                               | 0.521 / 0.739                                                                      | 0.712 / 0.828                                                                     |
| Refinement                              |                                                                                    |                                                                                   |
| No. of Observed Data                    | 11082                                                                              | 5513                                                                              |
| No. of Parameters                       | 610                                                                                | 288                                                                               |
| R1 <sup>a</sup> , wR2 <sup>b</sup>      | 0.0464, 0.0925                                                                     | 0.0513, 0.0726                                                                    |
| Goodness of Fit Indicator               | 1.144                                                                              | 1.016                                                                             |

$${}^aR1 = \sum | |Fo| - |Fc| | / \sum |Fo| \quad {}^bWR2 = [\sum w((Fo^2 - Fc^2)^2) / \sum w(Fo^2)^2]^{1/2} \quad w = [\sigma^2(Fo^2)]^{-1}$$

CCDC #2232896 ([PdCl<sub>2</sub>(L6)<sub>2</sub>]), #2232897 ([PdCl<sub>2</sub>(L11)<sub>2</sub>])

**Table S2.** ORTEP drawing (ellipsoids at 50% probability), selected distances, and angles of  $[\text{PdCl}_2(\text{L6})_2]$  measured at  $-180\text{ }^\circ\text{C}$ . All hydrogens of the ligands and crystal solvents were omitted for clarity.

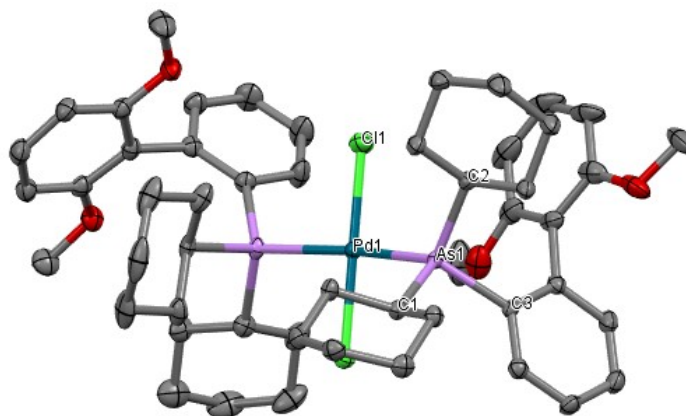

| Distances (Å) |           | Angles (°)  |          |
|---------------|-----------|-------------|----------|
| Pd1-Cl1       | 2.294(1)  | Cl1-Pd1-As1 | 93.48(3) |
| Pd1-As1       | 2.4440(6) | Pd-As1-C1   | 104.7(1) |
| As1-C1        | 1.977(3)  | Pd-As1-C2   | 116.9(1) |
| As1-C2        | 1.977(3)  | Pd-As1-C3   | 117.8(1) |
| As1-C3        | 1.970(3)  | C1-As1-C2   | 108.2(1) |
|               |           | C2-As1-C3   | 105.0(1) |
|               |           | C1-As1-C3   | 103.0(1) |

**Table S3.** ORTEP drawing (ellipsoids at 50% probability), selected distances, and angles of  $[\text{PdCl}_2(\text{L11})_2]$  measured at  $-180\text{ }^\circ\text{C}$ . All hydrogens of the ligands and crystal solvents were omitted for clarity.

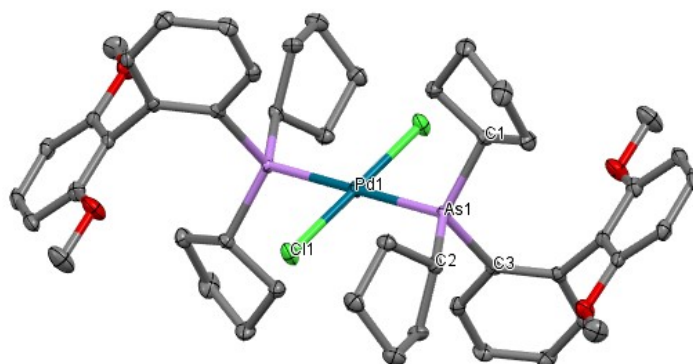

| Distances (Å) |           | Angles (°)  |           |
|---------------|-----------|-------------|-----------|
| Pd1-Cl1       | 2.3027(7) | Cl1-Pd1-As1 | 93.37(2)  |
| Pd1-As1       | 2.4268(3) | Pd-As1-C1   | 110.27(8) |
| As1-C1        | 1.963(3)  | Pd-As1-C2   | 121.71(8) |
| As1-C2        | 1.952(3)  | Pd-As1-C3   | 103.35(8) |
| As1-C3        | 1.947(4)  | C1-As1-C2   | 105.8(1)  |
|               |           | C2-As1-C3   | 100.7(1)  |
|               |           | C1-As1-C3   | 115.1(1)  |

## 6. The ligand screening containing conventional ligands in hindered Suzuki-Miyaura coupling reaction.

Commercially available ligands were examined to compare with the results shown in Table 1 of the main text: triphenylphosphine (PPh<sub>3</sub>), triphenylarsine (AsPh<sub>3</sub>), and SPhos. The tendency that PPh<sub>3</sub> showed higher catalytic activity than SPhos is in good agreement with that reported in a previous paper.<sup>2</sup>

**Table S4.** The ligand screening containing conventional ligands in hindered Suzuki-Miyaura coupling reaction<sup>a</sup>.

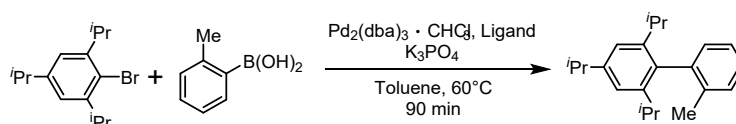

| Entry | Ligand            | NMR yield (%) <sup>b</sup> |
|-------|-------------------|----------------------------|
| 1     | <b>L1</b>         | 4                          |
| 2     | <b>L2</b>         | 14                         |
| 3     | <b>L3</b>         | 18                         |
| 4     | <b>L4</b>         | 27                         |
| 5     | <b>L5</b>         | 29                         |
| 6     | <b>L6</b>         | 47                         |
| 7     | <b>L7</b>         | 55                         |
| 8     | <b>L8</b>         | <1                         |
| 9     | <b>L9</b>         | 74                         |
| 10    | <b>L10</b>        | 12                         |
| 11    | <b>L11</b>        | 90                         |
| 12    | PPh <sub>3</sub>  | 27                         |
| 13    | AsPh <sub>3</sub> | 11                         |
| 14    | SPhos             | 14                         |

[a] Reaction conditions: 1 equiv. of aryl bromide, 2 equiv. of boronic acid, 3 equiv. of K<sub>3</sub>PO<sub>4</sub>, toluene (2 mL/mol halide), cat. Pd<sub>2</sub>(dba)<sub>3</sub>·CHCl<sub>3</sub>, ligand (L: Pd = 2:1), 60°C, 90 min. [b] NMR yield based on an average of several runs.

## 7. Protodeboronation of 1,3,5-trifluorophenyl boronic acids

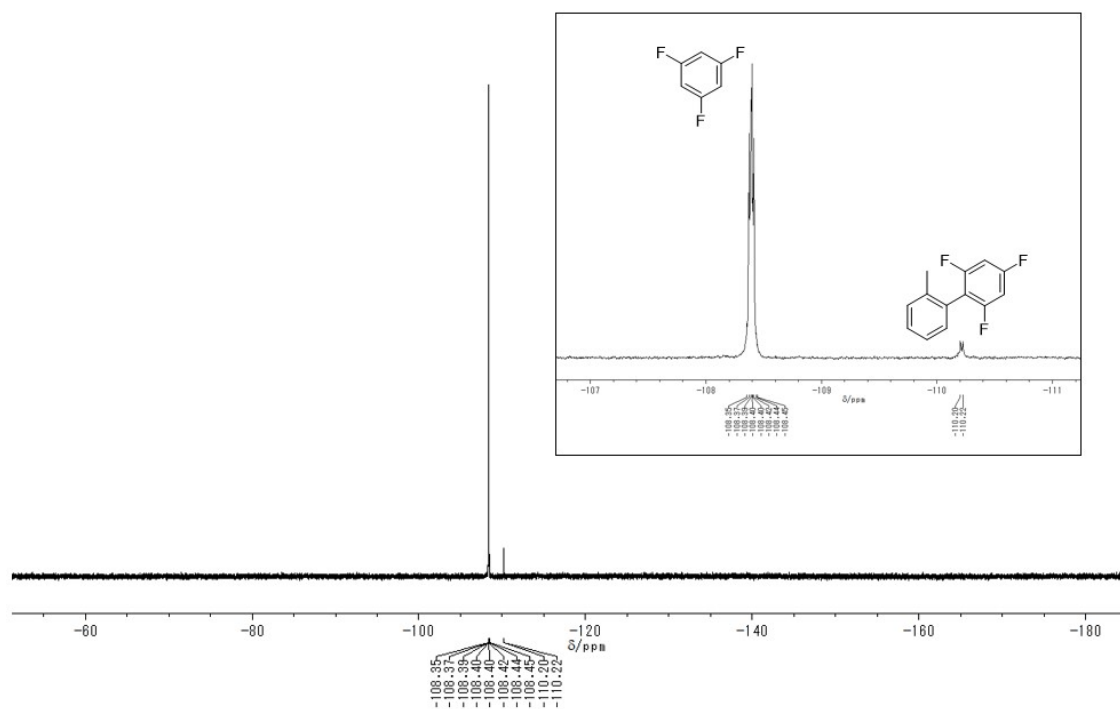

**Figure S44.**  $^{19}\text{F}$ -NMR spectrum (376 MHz) of reaction mixture containing **P13** in toluene/ $\text{CDCl}_3$ .

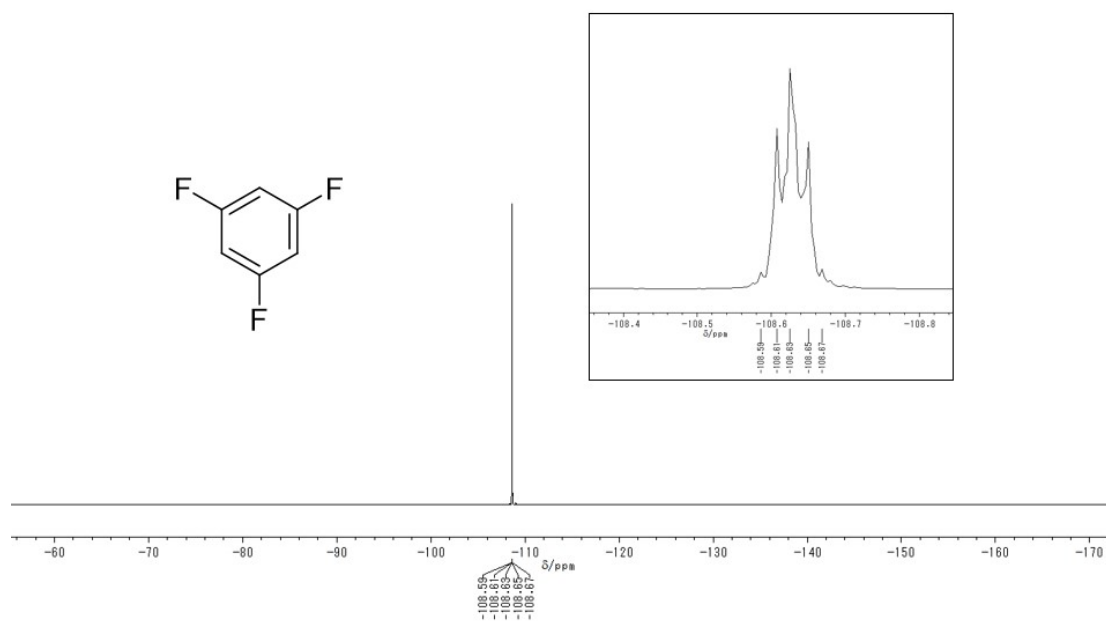

**Figure S45.**  $^{19}\text{F}$ -NMR spectrum (376 MHz) of 1,3,5-trifluorobenzene in  $\text{CDCl}_3$ .



## 8. DFT Calculation

Gaussian 16 was employed.<sup>3</sup> Cartesian coordinates in the optimized structures; B3LYP-D3 functional with the LanL2DZ effective core potential for Ni and the def2-TZVP basis set for all other atoms.

**Table S5.** Optimized structure of PPh<sub>3</sub>Ni(CO)<sub>3</sub>.

| Number | Atom | X        | Y        | Z        |
|--------|------|----------|----------|----------|
| 1      | Ni   | 2.16591  | 0.004679 | -0.00126 |
| 2      | C    | 2.655828 | 0.328363 | -1.71742 |
| 3      | O    | 2.939373 | 0.538442 | -2.80101 |
| 4      | C    | 2.661821 | -1.64116 | 0.57762  |
| 5      | O    | 2.949271 | -2.68327 | 0.938299 |
| 6      | C    | 2.653772 | 1.330964 | 1.135868 |
| 7      | O    | 2.935888 | 2.1655   | 1.85882  |
| 8      | C    | -0.88296 | 1.166764 | -1.18402 |
| 9      | C    | -0.25635 | 2.40235  | -1.3682  |
| 10     | C    | -2.05326 | 0.887296 | -1.89225 |
| 11     | C    | -0.79887 | 3.347681 | -2.22794 |
| 12     | H    | 0.666466 | 2.613284 | -0.84202 |
| 13     | C    | -2.58955 | 1.831015 | -2.7617  |
| 14     | H    | -2.54492 | -0.06896 | -1.7721  |
| 15     | C    | -1.96735 | 3.063043 | -2.92775 |
| 16     | H    | -0.30373 | 4.301287 | -2.36048 |
| 17     | H    | -3.49425 | 1.601094 | -3.31052 |
| 18     | C    | -0.87663 | -1.61228 | -0.41985 |
| 19     | C    | -2.04863 | -2.08739 | 0.171781 |
| 20     | C    | -0.24345 | -2.39026 | -1.39297 |
| 21     | C    | -2.58009 | -3.3144  | -0.2104  |
| 22     | H    | -2.54525 | -1.5045  | 0.936131 |
| 23     | C    | -0.78102 | -3.60985 | -1.78135 |
| 24     | H    | 0.680592 | -2.03878 | -1.83517 |
| 25     | C    | -1.95116 | -4.07509 | -1.18942 |
| 26     | H    | -3.48615 | -3.67585 | 0.259644 |
| 27     | H    | -0.28072 | -4.20204 | -2.53706 |
| 28     | C    | -0.87996 | 0.438831 | 1.604425 |



|    |   |          |          |          |
|----|---|----------|----------|----------|
| 29 | C | -0.24968 | -0.01821 | 2.76508  |
| 30 | C | -2.05125 | 1.18991  | 1.719318 |
| 31 | C | -0.78945 | 0.253203 | 4.014927 |
| 32 | H | 0.673874 | -0.57787 | 2.682596 |
| 33 | C | -2.58485 | 1.47045  | 2.972607 |
| 34 | H | -2.54579 | 1.562874 | 0.832239 |
| 35 | C | -1.95889 | 0.999697 | 4.121137 |
| 36 | H | -0.29139 | -0.10772 | 4.905871 |
| 37 | H | -3.49039 | 2.059148 | 3.050028 |
| 38 | H | -2.36575 | -5.03087 | -1.48405 |
| 39 | H | -2.37517 | 1.220824 | 5.095821 |
| 40 | H | -2.38581 | 3.795523 | -3.6064  |
| 41 | P | -0.11477 | -0.00063 | -0.00034 |

**Table S6.** Optimized structure of  $\text{AsPh}_3\text{Ni}(\text{CO})_3$ .

| Number | Atom | X        | Y        | Z        |
|--------|------|----------|----------|----------|
| 1      | Ni   | 2.315581 | 0.002785 | -0.00514 |
| 2      | C    | 2.784272 | -0.14751 | -1.7491  |
| 3      | O    | 3.075007 | -0.23593 | -2.84702 |
| 4      | C    | 2.799911 | -1.42796 | 0.995195 |
| 5      | O    | 3.10171  | -2.33155 | 1.619963 |
| 6      | C    | 2.792236 | 1.587974 | 0.731356 |
| 7      | O    | 3.089109 | 2.583124 | 1.199804 |
| 8      | As   | -0.07208 | -0.00137 | 0.001009 |
| 9      | C    | -0.93795 | 0.746263 | -1.58654 |
| 10     | C    | -0.30094 | 1.814671 | -2.21708 |
| 11     | C    | -2.13823 | 0.259539 | -2.10148 |
| 12     | C    | -0.86738 | 2.403668 | -3.34115 |
| 13     | H    | 0.644826 | 2.179839 | -1.83425 |
| 14     | C    | -2.70042 | 0.846465 | -3.23084 |
| 15     | H    | -2.63375 | -0.58014 | -1.63123 |
| 16     | C    | -2.06868 | 1.92001  | -3.84905 |
| 17     | H    | -0.36665 | 3.233103 | -3.82446 |
| 18     | H    | -3.63119 | 0.461704 | -3.62884 |

|    |   |          |          |          |
|----|---|----------|----------|----------|
| 19 | C | -0.93026 | -1.75352 | 0.149972 |
| 20 | C | -2.14001 | -1.95567 | 0.812256 |
| 21 | C | -0.27888 | -2.83612 | -0.44015 |
| 22 | C | -2.69731 | -3.22905 | 0.871769 |
| 23 | H | -2.64639 | -1.12636 | 1.289373 |
| 24 | C | -0.84029 | -4.10633 | -0.38492 |
| 25 | H | 0.673746 | -2.68706 | -0.93468 |
| 26 | C | -2.051   | -4.30383 | 0.271062 |
| 27 | H | -3.63549 | -3.38056 | 1.391026 |
| 28 | H | -0.32862 | -4.94185 | -0.84577 |
| 29 | C | -0.93246 | 1.001153 | 1.44454  |
| 30 | C | -0.28124 | 1.033148 | 2.677172 |
| 31 | C | -2.14392 | 1.672717 | 1.288301 |
| 32 | C | -0.84447 | 1.714712 | 3.749485 |
| 33 | H | 0.672623 | 0.532717 | 2.795551 |
| 34 | C | -2.70311 | 2.359504 | 2.361266 |
| 35 | H | -2.65012 | 1.669969 | 0.331413 |
| 36 | C | -2.05692 | 2.378379 | 3.592438 |
| 37 | H | -0.3329  | 1.734766 | 4.703522 |
| 38 | H | -3.64266 | 2.882476 | 2.232773 |
| 39 | H | -2.48516 | -5.29438 | 0.320413 |
| 40 | H | -2.49252 | 2.915308 | 4.425564 |
| 41 | H | -2.50748 | 2.373358 | -4.72886 |

**Table S7.** Optimized structure of SPhosNi(CO)<sub>3</sub>.

| Number | Atom | X        | Y        | Z        |
|--------|------|----------|----------|----------|
| 1      | O    | -1.80369 | 2.848396 | -0.18543 |
| 2      | O    | -3.40432 | -1.26048 | 1.340521 |
| 3      | C    | -0.2581  | 0.386037 | 1.538443 |
| 4      | C    | 0.514629 | 0.416373 | 2.707697 |
| 5      | H    | 1.545927 | 0.098916 | 2.652635 |
| 6      | C    | -1.61106 | 0.773756 | 1.63625  |
| 7      | C    | -2.59085 | 0.763896 | 0.511429 |
| 8      | C    | 0.002676 | 0.829884 | 3.927674 |

|    |    |          |          |          |
|----|----|----------|----------|----------|
| 9  | H  | 0.639674 | 0.840821 | 4.802946 |
| 10 | C  | -2.66916 | 1.820698 | -0.4022  |
| 11 | C  | -3.50866 | -0.29028 | 0.394758 |
| 12 | C  | -2.11677 | 1.174401 | 2.875608 |
| 13 | H  | -3.1603  | 1.457421 | 2.934229 |
| 14 | C  | -3.58239 | 1.79097  | -1.45873 |
| 15 | H  | -3.62652 | 2.592068 | -2.18007 |
| 16 | C  | -1.327   | 1.214975 | 4.01372  |
| 17 | H  | -1.7505  | 1.535224 | 4.957374 |
| 18 | C  | -4.4486  | 0.713048 | -1.5705  |
| 19 | H  | -5.1563  | 0.685062 | -2.38922 |
| 20 | C  | -4.43527 | -0.32338 | -0.64869 |
| 21 | H  | -5.12745 | -1.14452 | -0.75209 |
| 22 | C  | -1.91003 | 4.013666 | -0.98757 |
| 23 | H  | -2.91987 | 4.432006 | -0.95165 |
| 24 | H  | -1.63695 | 3.811581 | -2.02796 |
| 25 | H  | -1.20892 | 4.729109 | -0.56638 |
| 26 | C  | -4.32616 | -2.33962 | 1.333511 |
| 27 | H  | -5.35575 | -1.98493 | 1.438554 |
| 28 | H  | -4.06616 | -2.95423 | 2.192019 |
| 29 | H  | -4.23726 | -2.93799 | 0.422992 |
| 30 | Ni | 2.58785  | -1.37876 | 0.527046 |
| 31 | C  | 3.829048 | -0.26342 | 1.223954 |
| 32 | O  | 4.611918 | 0.45194  | 1.647868 |
| 33 | C  | 1.988228 | -2.62043 | 1.707242 |
| 34 | O  | 1.583365 | -3.39137 | 2.443582 |
| 35 | C  | 3.175612 | -2.11365 | -1.01449 |
| 36 | O  | 3.567616 | -2.57641 | -1.98209 |
| 37 | C  | -0.47038 | -0.97777 | -1.10545 |
| 38 | C  | 0.046158 | -1.12617 | -2.5442  |
| 39 | C  | -0.81797 | -2.35135 | -0.5073  |
| 40 | H  | -1.37757 | -0.37881 | -1.15571 |
| 41 | C  | -0.95989 | -1.89243 | -3.4115  |
| 42 | H  | 1.002311 | -1.65555 | -2.54868 |
| 43 | H  | 0.220188 | -0.14445 | -2.98671 |

|    |   |          |          |          |
|----|---|----------|----------|----------|
| 44 | C | -1.81874 | -3.10785 | -1.38383 |
| 45 | H | 0.102418 | -2.93645 | -0.42096 |
| 46 | H | -1.21446 | -2.23325 | 0.502201 |
| 47 | C | -1.30031 | -3.25859 | -2.81453 |
| 48 | H | -0.55875 | -2.00596 | -4.42206 |
| 49 | H | -1.8778  | -1.29997 | -3.49972 |
| 50 | H | -2.02752 | -4.08759 | -0.9454  |
| 51 | H | -2.76506 | -2.55762 | -1.40615 |
| 52 | H | -2.03813 | -3.77155 | -3.43718 |
| 53 | H | -0.40112 | -3.88494 | -2.8094  |
| 54 | C | 1.127837 | 1.520247 | -0.80363 |
| 55 | C | 1.439148 | 2.623022 | 0.222463 |
| 56 | C | 2.324131 | 1.344061 | -1.75817 |
| 57 | H | 0.244532 | 1.821027 | -1.37626 |
| 58 | C | 1.85184  | 3.93324  | -0.45645 |
| 59 | H | 2.253582 | 2.28721  | 0.873301 |
| 60 | H | 0.574044 | 2.795503 | 0.860317 |
| 61 | C | 2.707334 | 2.658246 | -2.44325 |
| 62 | H | 3.175804 | 0.979277 | -1.17854 |
| 63 | H | 2.12368  | 0.579742 | -2.50738 |
| 64 | C | 3.027275 | 3.742216 | -1.41421 |
| 65 | H | 2.094041 | 4.678195 | 0.306292 |
| 66 | H | 1.00055  | 4.327903 | -1.02119 |
| 67 | H | 3.562673 | 2.490696 | -3.10298 |
| 68 | H | 1.88049  | 2.994071 | -3.08064 |
| 69 | H | 3.272036 | 4.684727 | -1.91116 |
| 70 | H | 3.914759 | 3.445121 | -0.84446 |
| 71 | P | 0.713692 | -0.10547 | 0.033179 |

**Table S8.** Optimized structure of **L6Ni(CO)<sub>3</sub>**.

| Number | Atom | X        | Y        | Z        |
|--------|------|----------|----------|----------|
| 1      | As   | -0.65832 | -0.11628 | 0.03489  |
| 2      | C    | 0.365637 | 0.514227 | 1.604947 |
| 3      | C    | -0.41299 | 0.580083 | 2.764374 |

|    |    |          |          |          |
|----|----|----------|----------|----------|
| 4  | H  | -1.44023 | 0.241877 | 2.724417 |
| 5  | C  | 1.709173 | 0.920072 | 1.671785 |
| 6  | C  | 2.654882 | 0.853104 | 0.522497 |
| 7  | C  | 0.100436 | 1.054405 | 3.963058 |
| 8  | H  | -0.53077 | 1.096055 | 4.841732 |
| 9  | C  | 3.564552 | -0.20914 | 0.425529 |
| 10 | C  | 2.681798 | 1.848732 | -0.46018 |
| 11 | C  | 2.216433 | 1.383904 | 2.887744 |
| 12 | H  | 3.256033 | 1.684039 | 2.931175 |
| 13 | C  | 4.441953 | -0.30581 | -0.65622 |
| 14 | H  | 5.129508 | -1.13264 | -0.74325 |
| 15 | C  | 1.425765 | 1.462066 | 4.02451  |
| 16 | H  | 1.846062 | 1.829845 | 4.952159 |
| 17 | C  | 4.410744 | 0.673683 | -1.63786 |
| 18 | H  | 5.080335 | 0.596083 | -2.48497 |
| 19 | C  | 3.546208 | 1.755766 | -1.55345 |
| 20 | H  | 3.55347  | 2.510229 | -2.32468 |
| 21 | Ni | -2.57765 | -1.4345  | 0.638051 |
| 22 | C  | -1.9299  | -2.59782 | 1.867133 |
| 23 | O  | -1.50039 | -3.32356 | 2.634548 |
| 24 | C  | -3.80048 | -0.27449 | 1.285312 |
| 25 | O  | -4.57346 | 0.467814 | 1.67926  |
| 26 | C  | -3.1348  | -2.23693 | -0.87935 |
| 27 | O  | -3.49852 | -2.74312 | -1.83582 |
| 28 | C  | -1.12972 | 1.572463 | -0.93011 |
| 29 | C  | -2.32766 | 1.308195 | -1.85317 |
| 30 | C  | -1.44969 | 2.695215 | 0.063407 |
| 31 | H  | -0.25422 | 1.852318 | -1.5222  |
| 32 | C  | -2.78242 | 2.583094 | -2.57113 |
| 33 | H  | -3.15488 | 0.920808 | -1.25082 |
| 34 | H  | -2.09835 | 0.532252 | -2.58411 |
| 35 | C  | -1.92243 | 3.965494 | -0.65364 |
| 36 | H  | -2.24114 | 2.360422 | 0.743414 |
| 37 | H  | -0.57689 | 2.913332 | 0.67762  |
| 38 | C  | -3.11424 | 3.691874 | -1.57179 |

|    |   |          |          |          |
|----|---|----------|----------|----------|
| 39 | H | -3.64884 | 2.36134  | -3.19979 |
| 40 | H | -1.98669 | 2.926376 | -3.24305 |
| 41 | H | -2.17387 | 4.731528 | 0.084883 |
| 42 | H | -1.09964 | 4.367101 | -1.25512 |
| 43 | H | -3.40948 | 4.604583 | -2.09613 |
| 44 | H | -3.97358 | 3.383517 | -0.96593 |
| 45 | C | 0.620294 | -1.05618 | -1.16481 |
| 46 | C | 0.992562 | -2.39728 | -0.52159 |
| 47 | C | 0.045465 | -1.25291 | -2.5715  |
| 48 | H | 1.509008 | -0.43469 | -1.24799 |
| 49 | C | 1.95485  | -3.19264 | -1.40957 |
| 50 | H | 0.079549 | -2.9818  | -0.36627 |
| 51 | H | 1.433926 | -2.2346  | 0.463325 |
| 52 | C | 1.014576 | -2.05437 | -3.45024 |
| 53 | H | -0.91055 | -1.78227 | -2.51806 |
| 54 | H | -0.14979 | -0.28647 | -3.04008 |
| 55 | C | 1.377177 | -3.39632 | -2.81137 |
| 56 | H | 2.17937  | -4.15612 | -0.94345 |
| 57 | H | 2.90102  | -2.64695 | -1.49043 |
| 58 | H | 0.573296 | -2.20811 | -4.43855 |
| 59 | H | 1.92843  | -1.46787 | -3.59856 |
| 60 | H | 2.087515 | -3.93701 | -3.4424  |
| 61 | H | 0.477603 | -4.0186  | -2.74429 |
| 62 | O | 1.815006 | 2.880529 | -0.27153 |
| 63 | O | 3.501526 | -1.12306 | 1.429398 |
| 64 | C | 1.856043 | 3.982654 | -1.16322 |
| 65 | H | 1.544795 | 3.695089 | -2.17236 |
| 66 | H | 1.15359  | 4.710977 | -0.76694 |
| 67 | H | 2.854771 | 4.426574 | -1.20387 |
| 68 | C | 4.38933  | -2.23036 | 1.416022 |
| 69 | H | 4.162603 | -2.80029 | 2.313877 |
| 70 | H | 4.228708 | -2.86187 | 0.538128 |
| 71 | H | 5.433614 | -1.90564 | 1.446252 |

---

**Table S9.** Optimized structure of **L7Ni(CO)<sub>3</sub>**.

| Number | Atom | X        | Y        | Z        |
|--------|------|----------|----------|----------|
| 1      | As   | 0.355168 | 0.024841 | 0.054677 |
| 2      | C    | -0.57726 | -0.74655 | 1.621757 |
| 3      | C    | 0.2526   | -0.92723 | 2.731138 |
| 4      | H    | 1.297384 | -0.65676 | 2.650687 |
| 5      | C    | -1.94289 | -1.06984 | 1.739203 |
| 6      | C    | -2.92862 | -0.91853 | 0.634117 |
| 7      | C    | -0.23289 | -1.42055 | 3.934925 |
| 8      | H    | 0.438006 | -1.55196 | 4.774326 |
| 9      | C    | -3.92013 | 0.062006 | 0.714315 |
| 10     | C    | -2.90352 | -1.75288 | -0.4841  |
| 11     | C    | -2.4222  | -1.54315 | 2.964761 |
| 12     | H    | -3.47506 | -1.78271 | 3.05027  |
| 13     | C    | -4.83185 | 0.236595 | -0.31923 |
| 14     | H    | -5.58195 | 1.014162 | -0.24834 |
| 15     | C    | -1.58127 | -1.72531 | 4.053984 |
| 16     | H    | -1.98001 | -2.10189 | 4.987502 |
| 17     | C    | -4.77611 | -0.57847 | -1.44471 |
| 18     | H    | -5.48214 | -0.43965 | -2.25342 |
| 19     | C    | -3.8159  | -1.58158 | -1.51842 |
| 20     | H    | -3.77834 | -2.23519 | -2.38092 |
| 21     | Ni   | 2.513573 | 0.941879 | 0.574972 |
| 22     | C    | 2.217395 | 2.071199 | 1.960114 |
| 23     | O    | 2.016754 | 2.779708 | 2.830663 |
| 24     | C    | 3.555705 | -0.47697 | 0.978496 |
| 25     | O    | 4.209865 | -1.38221 | 1.213885 |
| 26     | C    | 3.076416 | 1.779033 | -0.92445 |
| 27     | O    | 3.451472 | 2.29721  | -1.86915 |
| 28     | H    | -2.1683  | -2.54293 | -0.5406  |
| 29     | H    | -3.95493 | 0.708316 | 1.582094 |
| 30     | C    | 0.440552 | -1.46756 | -1.27104 |
| 31     | C    | 1.549653 | -1.19631 | -2.29643 |
| 32     | C    | 0.679665 | -2.81251 | -0.57573 |

|    |   |          |          |          |
|----|---|----------|----------|----------|
| 33 | H | -0.52535 | -1.48321 | -1.78225 |
| 34 | C | 1.647381 | -2.33259 | -3.32055 |
| 35 | H | 2.503026 | -1.09772 | -1.76838 |
| 36 | H | 1.387605 | -0.2469  | -2.80892 |
| 37 | C | 0.777783 | -3.95403 | -1.59355 |
| 38 | H | 1.61369  | -2.75988 | -0.00486 |
| 39 | H | -0.10689 | -3.02345 | 0.15061  |
| 40 | C | 1.864167 | -3.68382 | -2.63663 |
| 41 | H | 2.458857 | -2.12615 | -4.02314 |
| 42 | H | 0.723487 | -2.36814 | -3.90948 |
| 43 | H | 0.971547 | -4.89653 | -1.07487 |
| 44 | H | -0.18871 | -4.06666 | -2.09923 |
| 45 | H | 1.888274 | -4.4868  | -3.37775 |
| 46 | H | 2.842082 | -3.68222 | -2.14216 |
| 47 | C | -0.95639 | 1.302485 | -0.72095 |
| 48 | C | -1.28858 | 2.377291 | 0.319171 |
| 49 | C | -0.43306 | 1.931615 | -2.01622 |
| 50 | H | -1.85584 | 0.734031 | -0.95427 |
| 51 | C | -2.28661 | 3.397877 | -0.23665 |
| 52 | H | -0.36679 | 2.893923 | 0.608206 |
| 53 | H | -1.68712 | 1.918828 | 1.226643 |
| 54 | C | -1.43591 | 2.952329 | -2.56953 |
| 55 | H | 0.521538 | 2.431318 | -1.82634 |
| 56 | H | -0.24573 | 1.16285  | -2.76842 |
| 57 | C | -1.77423 | 4.026713 | -1.5341  |
| 58 | H | -2.48216 | 4.170473 | 0.51167  |
| 59 | H | -3.2397  | 2.89381  | -0.43023 |
| 60 | H | -1.03266 | 3.409581 | -3.47684 |
| 61 | H | -2.35398 | 2.429073 | -2.85997 |
| 62 | H | -2.51408 | 4.722688 | -1.93793 |
| 63 | H | -0.87442 | 4.614203 | -1.31866 |

**Table S10.** Optimized structure of **L10Ni(CO)<sub>3</sub>**.

| Number | Atom | X | Y | Z |
|--------|------|---|---|---|
|--------|------|---|---|---|



|    |    |          |          |          |
|----|----|----------|----------|----------|
| 1  | As | -0.28602 | -0.03855 | -0.04505 |
| 2  | C  | 0.668591 | 1.642959 | -0.45354 |
| 3  | C  | -0.1635  | 2.683604 | -0.87452 |
| 4  | H  | -1.23068 | 2.510945 | -0.92425 |
| 5  | C  | 2.057937 | 1.862638 | -0.40851 |
| 6  | C  | 0.770777 | -1.43159 | -0.99718 |
| 7  | H  | 1.473368 | -0.87427 | -1.61848 |
| 8  | C  | 3.05654  | 0.848201 | 0.038062 |
| 9  | C  | -0.08854 | -2.33454 | -1.89362 |
| 10 | H  | -0.96845 | -2.67129 | -1.34167 |
| 11 | H  | -0.45593 | -1.81922 | -2.78125 |
| 12 | C  | 0.056213 | -0.35419 | 1.882035 |
| 13 | H  | 1.112389 | -0.57981 | 1.989686 |
| 14 | C  | 0.34564  | 3.921491 | -1.24481 |
| 15 | H  | -0.32614 | 4.708029 | -1.56429 |
| 16 | C  | 3.285101 | 0.617477 | 1.39482  |
| 17 | C  | 3.84399  | 0.171659 | -0.89602 |
| 18 | C  | 2.557535 | 3.108494 | -0.79979 |
| 19 | H  | 3.628029 | 3.270306 | -0.76666 |
| 20 | C  | 4.255217 | -0.28857 | 1.808961 |
| 21 | H  | 4.417499 | -0.45558 | 2.866383 |
| 22 | C  | -0.34751 | 0.887214 | 2.717181 |
| 23 | H  | 0.520803 | 1.461499 | 3.041556 |
| 24 | H  | -0.96715 | 1.569381 | 2.12988  |
| 25 | C  | 1.716173 | 4.133358 | -1.21191 |
| 26 | H  | 2.132431 | 5.089281 | -1.50388 |
| 27 | C  | -0.80873 | -1.52868 | 2.413745 |
| 28 | H  | -0.18403 | -2.18223 | 3.028213 |
| 29 | H  | -1.23292 | -2.15036 | 1.624729 |
| 30 | C  | 5.017666 | -0.97326 | 0.86954  |
| 31 | H  | 5.770105 | -1.68205 | 1.190629 |
| 32 | C  | 1.551977 | -2.43543 | -0.14325 |
| 33 | H  | 2.399574 | -1.9925  | 0.374972 |
| 34 | H  | 0.89465  | -2.87674 | 0.610417 |
| 35 | C  | 4.812133 | -0.73667 | -0.4855  |

|    |    |          |          |          |
|----|----|----------|----------|----------|
| 36 | H  | 5.405298 | -1.26064 | -1.22427 |
| 37 | C  | -1.8929  | -0.87116 | 3.276023 |
| 38 | H  | -2.71148 | -0.53002 | 2.637661 |
| 39 | H  | -2.31243 | -1.55125 | 4.018483 |
| 40 | C  | -1.1762  | 0.335439 | 3.887547 |
| 41 | H  | -1.85889 | 1.078177 | 4.302515 |
| 42 | H  | -0.5167  | 0.004472 | 4.695669 |
| 43 | C  | 0.830726 | -3.53539 | -2.22379 |
| 44 | H  | 0.274067 | -4.47265 | -2.19031 |
| 45 | H  | 1.238011 | -3.44824 | -3.23203 |
| 46 | C  | 1.969657 | -3.50313 | -1.16746 |
| 47 | H  | 2.910026 | -3.20331 | -1.63514 |
| 48 | H  | 2.139918 | -4.47568 | -0.7037  |
| 49 | Ni | -2.64264 | 0.039384 | -0.54888 |
| 50 | C  | -3.34735 | 1.335719 | 0.494065 |
| 51 | O  | -3.80201 | 2.141505 | 1.162138 |
| 52 | C  | -2.7071  | 0.390614 | -2.32496 |
| 53 | O  | -2.72956 | 0.601119 | -3.44532 |
| 54 | C  | -3.30798 | -1.59037 | -0.1457  |
| 55 | O  | -3.74978 | -2.61179 | 0.106324 |
| 56 | H  | 3.688914 | 0.357412 | -1.95158 |
| 57 | H  | 2.706789 | 1.163511 | 2.128207 |

**Table S11.** Optimized structure of **L11Ni(CO)<sub>3</sub>**.

| Number | Atom | X        | Y        | Z        |
|--------|------|----------|----------|----------|
| 1      | As   | -0.65334 | 0.105567 | -0.00182 |
| 2      | O    | 2.44408  | -2.5852  | -0.46892 |
| 3      | O    | 3.03166  | 1.592883 | 1.525589 |
| 4      | C    | 0.383258 | -0.6382  | 1.503004 |
| 5      | C    | -0.39915 | -1.01484 | 2.597251 |
| 6      | H    | -1.46749 | -0.84523 | 2.558437 |
| 7      | C    | 1.772989 | -0.84141 | 1.559606 |
| 8      | C    | 0.364478 | 1.705945 | -0.5955  |
| 9      | H    | 1.096416 | 1.870862 | 0.193823 |

|    |   |          |          |          |
|----|---|----------|----------|----------|
| 10 | C | 2.727782 | -0.46808 | 0.473647 |
| 11 | C | -0.49669 | 2.967646 | -0.73343 |
| 12 | H | -1.37146 | 2.754629 | -1.35211 |
| 13 | H | -0.86811 | 3.3377   | 0.222348 |
| 14 | C | -0.39456 | -1.2471  | -1.42386 |
| 15 | H | 0.661608 | -1.25286 | -1.67715 |
| 16 | C | 0.161108 | -1.59237 | 3.728959 |
| 17 | H | -0.47147 | -1.87536 | 4.560837 |
| 18 | C | 3.067023 | -1.37799 | -0.53551 |
| 19 | C | 3.385289 | 0.769188 | 0.501628 |
| 20 | C | 2.322686 | -1.4188  | 2.705924 |
| 21 | H | 3.394387 | -1.5704  | 2.744523 |
| 22 | C | 3.991449 | -1.04103 | -1.52776 |
| 23 | H | 4.239614 | -1.73413 | -2.31638 |
| 24 | C | -0.84917 | -2.63881 | -0.92519 |
| 25 | H | -0.01019 | -3.23141 | -0.56814 |
| 26 | H | -1.54224 | -2.54065 | -0.0861  |
| 27 | C | 1.532224 | -1.79696 | 3.782255 |
| 28 | H | 1.988104 | -2.2442  | 4.656724 |
| 29 | C | -1.25924 | -0.93699 | -2.67758 |
| 30 | H | -0.62735 | -0.97197 | -3.56851 |
| 31 | H | -1.71736 | 0.052276 | -2.65697 |
| 32 | C | 4.605141 | 0.202084 | -1.48342 |
| 33 | H | 5.322488 | 0.466577 | -2.24976 |
| 34 | C | 1.07616  | 1.635276 | -1.95113 |
| 35 | H | 1.928019 | 0.959079 | -1.9567  |
| 36 | H | 0.378271 | 1.294118 | -2.71906 |
| 37 | C | 4.320354 | 1.112258 | -0.47648 |
| 38 | H | 4.815233 | 2.070711 | -0.46292 |
| 39 | C | -2.31505 | -2.05132 | -2.72912 |
| 40 | H | -3.16872 | -1.77677 | -2.10376 |
| 41 | H | -2.68873 | -2.2321  | -3.73793 |
| 42 | C | -1.59783 | -3.25568 | -2.11302 |
| 43 | H | -2.2768  | -4.05559 | -1.81364 |
| 44 | H | -0.88813 | -3.67598 | -2.83353 |

|    |    |          |          |          |
|----|----|----------|----------|----------|
| 45 | C  | 0.436483 | 3.967041 | -1.44973 |
| 46 | H  | -0.11998 | 4.631126 | -2.11201 |
| 47 | H  | 0.940514 | 4.602513 | -0.71879 |
| 48 | C  | 1.473418 | 3.099744 | -2.21979 |
| 49 | H  | 2.480657 | 3.281451 | -1.83927 |
| 50 | H  | 1.493671 | 3.325506 | -3.28677 |
| 51 | C  | 2.679179 | -3.53843 | -1.49253 |
| 52 | H  | 3.731569 | -3.83324 | -1.53378 |
| 53 | H  | 2.369056 | -3.15834 | -2.47093 |
| 54 | H  | 2.07397  | -4.40493 | -1.23699 |
| 55 | C  | 3.577645 | 2.901679 | 1.577765 |
| 56 | H  | 4.665023 | 2.879234 | 1.694007 |
| 57 | H  | 3.132025 | 3.373208 | 2.450359 |
| 58 | H  | 3.319445 | 3.476927 | 0.683168 |
| 59 | Ni | -2.98676 | 0.474506 | 0.477813 |
| 60 | C  | -3.71892 | -1.12578 | 0.885374 |
| 61 | O  | -4.20275 | -2.13023 | 1.129801 |
| 62 | C  | -2.97096 | 1.652167 | 1.852753 |
| 63 | O  | -2.94157 | 2.40219  | 2.711426 |
| 64 | C  | -3.69809 | 1.169275 | -1.02878 |
| 65 | O  | -4.16696 | 1.603637 | -1.9746  |

---

## 9. The electronic/steric parameters of several ligands

**Table S12.** The electronic/steric parameters of several ligands.

| Ligand            | Computed electronic parameter (CEP) / cm <sup>-1</sup> | Tolman electronic parameter (TEP)* / cm <sup>-1</sup> | Cone angle [°] | %V <sub>bur</sub> [%] |
|-------------------|--------------------------------------------------------|-------------------------------------------------------|----------------|-----------------------|
| PPh <sub>3</sub>  | 2136.1 <sup>4</sup>                                    | 2067.0                                                | 165.8          | 29.5                  |
| AsPh <sub>3</sub> | 2140.3 <sup>4</sup>                                    | 2071.3                                                | 158.8          | 22.8                  |
| SPhos             | 2140.3                                                 | 2055.7                                                | 173.7          | 35.1                  |
| <b>L6</b>         | 2127.4                                                 | 2058.1                                                | 168.6          | 27.9                  |
| <b>L7</b>         | 2130.2                                                 | 2060.9                                                | 167.9          | 27.3                  |
| <b>L10</b>        | 2130.1                                                 | 2061.0                                                | 177.7          | 29.1                  |
| <b>L11</b>        | 2127.9                                                 | 2058.6                                                | 176.5          | 28.7                  |

(equation 1) \*TEP<sup>4</sup> = 1.0168CEP-105.0

## 10. References

1. A. Sumida, H. Imoto, K. Naka, *Inorg. Chem.* **2022**, *61*, 17419.
2. W. Tang, A. G. Capacci, X. Wei, W. Li, A. White, N. D. Patel, J. Savoie, J. J. Gao, S. Rodriguez, B. Qu, N. Haddad, B. Z., D. Krishnamurthy, N. K. Yee, C. H. Senanayake, *Angew. Chem. Int. Ed.* **2010**, *49*, 5879.
3. A. E. Reed, L. A. Curtiss, F. Weinhold, *Chem. Rev.*, **1988**, *88*, 899. b) Gaussian 16, Revision C.01, M. J. Frisch, G. W. Trucks, H. B. Schlegel, G. E. Scuseria, M. A. Robb, J. R. Cheeseman, G. Scalmani, V. Barone, G. A. Petersson, H. Nakatsuji, X. Li, M. Caricato, A. V. Marenich, J. Bloino, B. G. Janesko, R. Gomperts, B. Mennucci, H. P. Hratchian, J. V. Ortiz, A. F. Izmaylov, J. L. Sonnenberg, D. Williams-Young, F. Ding, F. Lipparini, F. Egidi, J. Goings, B. Peng, A. Petrone, T. Henderson, D. Ranasinghe, V. G. Zakrzewski, J. Gao, N. Rega, G. Zheng, W. Liang, M. Hada, M. Ehara, K. Toyota, R. Fukuda, J. Hasegawa, M. Ishida, T. Nakajima, Y. Honda, O. Kitao, H. Nakai, T. Vreven, K. Throssell, J. A. Montgomery, Jr., J. E. Peralta, F. Ogliaro, M. J. Bearpark, J. J. Heyd, E. N. Brothers, K. N. Kudin, V. N. Staroverov, T. A. Keith, R. Kobayashi, J. Normand, K. Raghavachari, A. P. Rendell, J. C. Burant, S. S. Iyengar, J. Tomasi, M. Cossi, J. M. Millam, M. Klene, C. Adamo, R. Cammi, J. W. Ochterski, R. L. Martin, K. Morokuma, O. Farkas, J. B. Foresman and D. J. Fox, *Gaussian, Inc.*, Wallingford CT, **2016**.
4. J. W. Dube, Y. Zheng, W. Thiel, M. Alcarazo, *J. Am. Chem. Soc.*, **2016**, *138*, 6869.
